# Supplementary material for: Single-cell transcriptomics reveal differences between chorionic and basal plate cytotrophoblasts and trophoblast stem cells
Source: Research Square preprint supplement (doi:10.21203/rs.3.rs-6797967/v1), 2025-06-10
Supplement: Supplementary file 1 [file e9d9c070d33b05ecaaa405ca.xlsx]

## Sheet: Table_S1
Table S1: Sample information
Patient Number	Sampled Region	Gestational Age (weeks)	Isolation method	Analysis	Cell Recovery Target	Total Cells Captured	Total Counts/Cells Post Ambient RNA Removal
856		8w4d	Percoll	sc RNA-seq	5000	6905	9117
856		8w4d	Percoll	sc RNA-seq	10000	12938	5881
860		6w5d	Percoll	sc RNA-seq	5000	4317	7585
860		6w5d	Percoll	sc RNA-seq	10000	8128	7016
861		12w2d	Percoll	sc RNA-seq	10000	19407	3965
866		13w0d	Percoll	sc RNA-seq	10000	8561	6294
1276	Basal Plate	6w5d	Dissection+Percoll	sc RNA-seq	2000	1179	17182
1276	Chorionic Plate	6w5d	Dissection+Percoll	sc RNA-seq	2000	1468	10615
1290	Basal Plate	6w2d	Dissection+Percoll	sc RNA-seq	2000	1291	15313
1290	Chorionic Plate	6w2d	Dissection+Percoll	sc RNA-seq	2000	1115	15964
906	TSC	5w5d	ITGA6+ cells	sc RNA-seq	8000	2550	43769
1000	TSC	6w3d	ITGA6+ cells	sc RNA-seq	8000	2733	41591
1278	TSC	6w4d	Basal Plate	sc RNA-seq	8000	2851	44758
1815_d0	CTB	8w3d	ITGA6+ cells (not sorted for A6)	sc RNA-seq	8000	9605	10691
1816_d0	CTB	8w1d	ITGA6+ cells (not sorted for A6)	sc RNA-seq	8000	8297	10309
1815_d1	CTB	8w3d	TSC media time course	sc RNA-seq	8000	14290	10387
1816_d1	CTB	8w1d	TSC media time course	sc RNA-seq	8000	13693	10306
1815_d4	CTB	8w3d	TSC media time course	sc RNA-seq	8000	12693	7896
1816_d4	CTB	8w1d	TSC media time course	sc RNA-seq	8000	5370	18537
1815_d10	TSC	8w3d	TSC media time course	sc RNA-seq	8000	8274	7423
1816_d10	TSC	8w1d	TSC media time course	sc RNA-seq	8000	9761	13513
1048	TSC	6wk2d	EGFR+ cells	flow
1049	TSC	6wk1d	ITGA6+ cells	flow
935	TSC	6wk2d	ITGA6+ cells	flow
1459	BP/CP	6w0d		WTA
1347	BP/CP	6w3d		WTA
1344	BP/CP	6w4d		WTA

## Sheet: Table_S2
Table S2: Top 200 marker genes in each cluster in the first trimester placenta samples
Cluster #	0	1	2	3	4	5	6	7	8	9	10	11	12	13	14	15	16	17	18	19	20	21
	PEG10	CXCL14	HMGB2	PAGE4	PAGE4	RPL21	SPP1	DLK1	MT-CO3	COL3A1	CGA	KRT19	DLK1	PAGE4	RPS3	COL3A1	TMSB4X	CGA	TMSB4X	MT-CO3	TMSB4X	CGA
	IFI6	DCN	H2AFZ	RPS12	PEG10	PAGE4	FTL	SPARC	MT-CO2	COL6A2	INSL4	TPM1	TMSB4X	IFI6	RPS2	COL1A1	FTL	PHLDA2	VIM	MT-CO2	MALAT1	INSL4
	PAGE4	LUM	STMN1	RPL21	ARL6IP1	RPL17	TMSB4X	EGFL6	MT-CO1	COL1A1	GADD45G	KRT8	COL3A1	PEG10	RPSA	DCN	B2M	S100P	GNG11	MT-ND2	B2M	KRT19
	SPINT2	IFITM3	HIST1H4C	RPL34	HMGB1	RPS17	DAB2	CALD1	PEG10	MEG3	CSF3R	FSTL3	LGALS1	C1orf56	LY6E	SPARC	TYROBP	KRT23	EGFL7	MT-CO1	HLA-A	TFPI
	SPINT1	COL3A1	PEG10	RPS27	HMGN2	RPS12	TYROBP	COL4A1	MT-ND4	COL1A2	ANXA1	KRT7	SPARC	RPLP1	RPL7A	COL1A2	HLA-B	PAGE4	H19	MT-ND4	HLA-C	RPS26
	MGST3	DLK1	MT-CO3	RPS14	STMN1	PTMA	CD14	LGALS1	MT-ND2	DLK1	PHLDA2	QSOX1	H19	RPL41	RPS17	LUM	FTH1	ANXA1	CAV1	MT-ATP6	HLA-E	KRT8
	PHLDA2	MEG3	DEK	RPS27A	SPINT2	RPL41	NPC2	COL6A2	MT-ND3	COL6A1	KRT23	TMSB10	COL1A1	PHLDA2	RPL8	VIM	CD74	EIF1	PECAM1	MT-ND3	ARHGDIB	PAGE4
	KRT18	COL1A1	PAGE4	RPL13A	CD24	RPS27A	FOLR2	COL6A1	MT-CYB	FN1	TBX3	MFAP5	CALD1	CTNNB1	RPS5	COL6A2	HLA-DRA	XAGE3	RAMP2	MT-CYB	HLA-B	LAIR2
	EFEMP1	COL6A2	HMGB1	RPL17	PERP	RPL23A	B2M	COL3A1	MT-ND1	MALAT1	SLC43A2	COTL1	IFITM3	LRRC75A	RPS9	LGALS1	IFI30	INSL4	TMSB10	MT-ND1	CD52	RPS17
	XAGE3	SERPINE2	MT-CO1	RPL27A	KRT18	RPS6	C1QA	AGTR1	MT-ATP6	SERPINE2	SLC22A11	C12orf75	VIM	RPS12	RPS3A	COL6A1	CYBA	RPS12	SPARC	APLP2	PTMA	CD63
	TINAGL1	CALD1	MT-CO2	PHLDA2	PTTG1	RPS3A	FCER1G	COL6A3	PHLDA2	DCN	SLC40A1	LAIR2	COL6A2	XAGE3	RPL18A	DLK1	LGALS1	PGF	TFPI2	MT-ND5	CYBA	BTG3
	SMAGP	IGFBP3	PCLAF	RPL31	XAGE3	RPL31	AIF1	MEST	FBN2	VCAN	CEBPB	ASCL2	DCN	RPL37	RPL17	CALD1	FCER1G	GADD45G	KDR	MALAT1	CORO1A	RPS13
	DUSP9	EGFL6	PCNA	RPL26	MGST3	RPS19	F13A1	COL4A2	MT-ND5	CXCL14	CDKN1C	KRT18	COL1A2	RPS3	RPL7	TMSB4X	VIM	RPL21	COL4A1	BSG	SRGN	SNHG29
	FXYD3	COL1A2	TUBB	RPLP1	VGLL1	RPL13A	LYVE1	HGF	PAGE4	EGFL6	S100P	DIO2	CXCL14	RPS27	KRT19	MEG3	NPC2	RPS27	MARCKS	SPINT2	PTPRC	SLC16A3
	VGLL1	GPC3	XAGE3	RPS25	HMGN3	RPL26	S100A9	AREG	MALAT1	LUM	SLC2A1	EFNA1	LUM	RPS29	HNRNPA1	FN1	PSAP	RPL34	BST2	SPINT1	SH3BGRL3	RPS6
	PERP	SPARC	MT-ND1	RPS19	HSPE1	RPLP0	ITM2B	MEG3	CSF3R	IGFBP3	SQSTM1	SLC16A3	EGFL6	RPL31	NPM1	CXCL14	SH3BGRL3	CYP11A1	TM4SF1	FBLN1	RAC2	GLRX
	MT-CO3	TMSB4X	DUT	RPS13	MT-CO3	RPS15A	LGMN	COL1A2	PEG3	IL6ST	ST3GAL4	RPS27L	COL6A1	RPS16	EEF1G	COL5A2	APOC1	CEBPB	MEG3	PAGE4	GMFG	BSG
	BCAM	PHACTR2	MT-ND4	RPL41	GSTP1	RPS2	SELENOP	VCAN	GNAS	PLAGL1	PRKCZ	JPT1	TPM2	RPL11	RPL5	COL5A1	CTSD	FDX1	IFITM3	HSPA5	ACTB	SLC2A1
	APLP2	VIM	TUBA1B	RPLP0	HSPD1	RPL11	C1QB	IFITM3	CDKN1C	SPARC	LCMT1-AS2	GLRX	IGFBP3	RPS21	RPS27A	S100A10	APOE	SQSTM1	CD93	PSAP	S100A4	S100A11
	MT-CO1	HAPLN1	HELLS	RPS15A	HSP90AA1	RPS14	FCGRT	TFPI	DDB1	HGF	ERVW-1	PPP1R14B	MDK	RPS24	RPS6	COL4A1	HLA-A	KRT18	CDH5	CLDN4	IL32	KRT18
	BSG	HGF	NASP	RPL23A	IFI6	RPS13	CYBA	COX4I2	DNMT1	GPC3	CLIP1	PGF	SERPINE2	S100A11	RPS13	IFITM3	HLA-DRB1	S100A11	MARCKSL1	SON	HCST	RPS10
	SLC22A11	COL6A1	GGCT	RPS6	MT2A	RPS3	CTSZ	PPP1R14A	BCAM	HAPLN1	MALAT1	TFPI	FN1	RPS18	RPL10A	GPC3	S100A4	HSPB8	ICAM2	PDIA3	RPL10	PFN1
	KRT7	LGALS1	CKS1B	RPS16	GGH	RPLP1	C1QC	WNT2	EGFR	CALD1	TOP1	H19	GPC3	RPL21	RPS7	OGN	CTSB	RPS27A	TCIM	BCAM	LIMD2	RPL21
	COMT	IL6ST	MT-ND2	XAGE3	EFEMP1	RPS16	HPGDS	ITGA1	DSP	COL5A1	PGF	EBI3	B2M	RPL18A	RPL3	CTHRC1	LAPTM5	HSD17B1	CD34	VWA1	FXYD5	GAPDH
	XAGE2	VCAN	RANBP1	RPS3A	HMGA1	HMGB1	VSIG4	COL1A1	SLC43A2	H19	SLC13A4	SOX4	CTHRC1	AC092069.1	RPL15	EGFL6	TMSB10	COX6C	JAM2	P4HB	LTB	RPL31
	CD24	PITX2	MT-CYB	RPL10A	HNRNPA1	RPL35	CD36	NDUFA4L2	MBNL3	KCNQ1OT1	COBLL1	MORF4L2	ACTA2	KRT18	EEF1B2	MGP	CTSS	RPL23A	ARHGAP29	EFEMP1	LAPTM5	PHLDA2
	SLC2A1	PLAGL1	PHLDA2	S100A11	KRT7	RPL27A	LY96	PLA2G2A	H19	COL14A1	NFE2L3	GATA3	PLA2G2A	SPP1	GAPDH	COL4A2	SAT1	VGLL1	COL4A2	IFI6	CRIP1	XAGE3
	DNMT1	PLAC9	SPINT2	RPS17	BSG	RPL18A	CD68	FN1	APLP2	VIM	ARID5B	PLAC8	FTL	RPL32	NME2	COL14A1	HLA-DPA1	FAU	ESAM	APP	RPS9	CGB3
	ISYNA1	CTHRC1	SMC4	RPL18A	DUSP9	RPS25	PLTP	TPM2	SRSF5	COL5A2	UBE2B	IGFBP3	VCAN	PHKG1	BTF3	MYL9	AIF1	SLC40A1	TIE1	TINAGL1	FTL	RPL9
	LDHB	COL14A1	CDK1	RPL35A	RAN	RPS27	BLVRB	MALAT1	XAGE3	CDH11	CYP19A1	FOS	HAPLN1	RPS19	RPL4	COL15A1	HLA-DPB1	CDKN1C	FN1	SLC2A1	FYB1	PPIB
	PRDX5	CDH11	TYMS	RPS2	PSMB6	RPS8	ASAH1	FRZB	TENM3	COL6A3	CYP11A1	SRI	HGF	RPS15A	RPL29	LTBP1	CD68	PRKCZ	MEF2C	NFE2L3	CD3D	S100P
	MT-CO2	FN1	BSG	RPS18	HNRNPA2B1	TUBA1B	ATP5F1E	TIMP1	TGM2	MT-ND4	SLC52A1	FN1	MYL9	AC006115.2	HMGA1	SERPINE2	LYZ	RPL41	PCAT19	MGST3	IL2RG	LDHA
	BEX3	MARCKS	BCAM	RPS20	MT-CO1	RPL34	MAF	WFDC1	N4BP2L2	COL15A1	MUC15	HLA-G	TIMP1	RPL23A	RPS16	TPM2	CSTB	RPS13	SPTBN1	LRPAP1	NKG7	NACA
	SLC43A2	ENPP1	HMGA1	RPL11	PHLDA2	RPL8	CD63	CCDC68	SLC26A2	PHACTR2	HSPB8	PTPRF	TAGLN	RPL14	RPL11	TAGLN	HLA-C	RPLP1	MALAT1	FBN2	RPS4X	RPS3A
	NFE2L3	WNT2	FUS	RPL7	H2AFZ	RPS15	FTH1	IGFBP7	SIGLEC6	MEG8	PAPOLA	CDKN1C	ACTB	RPS27A	GCSH	PCOLCE	TYMP	ARG2	CCDC85B	DSP	TRAC	MGST3
	FBN2	PCOLCE	GMNN	RPS28	PEBP1	RPSA	CSTB	C4orf48	TCAF1	COL4A1	ATP6V0C	SH3BP5	MGP	C15orf48	RPL6	S100A6	SPP1	RPS14	WARS	MT-ND6	TRAF3IP3	GATA3
	CSF3R	CCND2	PTMA	RPL32	APLP2	RPL35A	CTSC	STOM	RBM39	ENPP1	SECISBP2L	ITGA5	COL4A1	SPINT2	RACK1	SERPINH1	TSPO	HMGB3	FABP5	PEG10	LSP1	SERPINB2
	KRT8	S100A10	SIVA1	RPL8	PSMB1	RPS18	CTSB	GATM	CRYBG1	MT-ATP6	TAX1BP1	BZW2	PCOLCE	MGST3	ENO1	TGFBI	ACTB	BTG3	S100A16	CTSL	BTG1	GGH
	EGFR	CFD	SNRPG	RPL12	PRDX2	RPS5	BRI3	H19	MIR205HG	MT-ND3	KCNN4	TCF7L2	PLAC9	PTMA	RPS19	MALAT1	CAPG	KRT8	ECSCR	SYNE2	GPSM3	SSR2
	OLR1	TIMP1	DNMT1	RPL13	H2AFV	RPS20	ATP6AP2	PLAGL1	CDH1	MT-CYB	BTG3	C1QTNF6	CCND2	SET	RPL26	MDK	SRGN	NUPR1	SOCS3	HSP90AA1	CELF2	RPLP0
	VWA1	S100A6	PRC1	RPS3	KRT19	XAGE3	CTSD	GPC3	SLC22A11	MT-CO3	EIF4G2	TGFB1	SEPTIN7	AL450306.1	RPS18	MME	S100A6	RPS25	MEOX2	PEG3	CCL5	RPL35A
	MT-ND1	TGFBI	GCSH	RPS8	HSP90AB1	RPL36A	SH3BGRL3	TMSB4X	HMGN3	TMSB4X	NEAT1	MT1X	COL6A3	EEF1A1	RAN	IGFBP3	GPNMB	RPL17	SPARCL1	PDIA6	PCED1B-AS1	CALR
	PARP1	H19	MT-ATP6	RPL3	HMGB2	RPL7	ATP1B1	LHFPL6	FOXO4	MT-CO2	SLC1A2	TAGLN2	FRZB	EFEMP1	RPL19	DES	NEAT1	ST3GAL4	TCF4	ALDH7A1	RPL41	RPS24
	CLDN4	COL15A1	HNRNPD	RPL30	COX8A	RPL10A	CCL3	VIM	WSB1	PCOLCE	MT-CO1	NOTUM	WNT2	RPS25	RPL35A	SELENOM	CST3	LGALS16	GMFG	HSP90B1	RPL21	RPS7
	MT-ND2	OLFML3	SRSF2	RPS4X	SNRPG	RPL13	NPL	SFRP1	MSI2	WSB1	GDF15	ISG15	MARCKS	PERP	RPL13A	MMP23B	CTSZ	H3F3B	APLNR	KRT18	PSMB9	RPL37A
	TFDP2	B2M	RPS21	RPS24	LSM4	RPL15	RBPJ	NID2	APP	IFITM3	RRBP1	LIMA1	MEST	B4GALT1	RPLP0	CCND2	FABP5	TOP1	IFI16	DNMT1	GIMAP7	HSPA5
	PEBP1	MALAT1	PERP	RPL15	BCAM	RPS24	MS4A4A	NR2F1	SEMA6A	CCND2	SIAH1	CCNE1	MEG3	RPS14	RPL23A	EMP3	ITGB2	ERVW-1	HLA-E	TMED9	CD69	RPL23A
	MLLT1	KCNQ1OT1	ZWINT	RPS15	RPSA	STMN1	RGS10	LIPG	LAMA5	MT-CO1	GABARAPL1	HPGD	AREG	RPL17	YBX1	MAP1B	LSP1	RPL13A	FKBP1A	SLC43A2	GZMA	RPL41
	MT-CYB	GJA1	HMGN2	RPS29	PTMA	RPL7A	CREG1	TXNIP	SMARCA2	MFAP4	NUCB2	ARHGDIB	PHACTR2	XAGE2	HSP90AB1	PITX2	ATP5F1E	RPL26	VAMP5	RPN2	EVL	CDKN1C
	HMGN3	MDK	CKS2	RPS23	IDH2	RPL6	PMP22	PDGFRB	BRD4	PITX2	ARID3A	ARID3A	RPS23	AC106707.1	TPI1	TPM4	LST1	RPLP2	CAV2	SLC22A11	MTDH	HNRNPH1
	GSTP1	COL4A1	RRM2	RPL14	HINT1	HMGB2	CTSS	SEPTIN7	ADGRG1	FBLN2	TMEM40	COL4A1	APOE	PAQR7	RPL9	PLAC9	CD9	RAB11A	MEG8	ERP29	CD37	UBC
	VAMP8	CD63	NAP1L1	RPS7	RPS16	RPL14	CD163	PHACTR2	ITIH5	MT-ND2	TCAF1	AC211433.1	HSPB1	AC005921.2	AKR1B1	TIMP1	TREM2	MUC15	PRCP	SLC3A2	MYL12A	RPL26
	ALDH7A1	ENPP2	HNRNPA2B1	RPL18	BEX3	RPL32	C2	SDC2	OLR1	COL4A2	ABHD5	TLE5	PRG2	EIF5A	RPL18	PPIC	CCL3	RPL39	LRP6	CSF3R	RPL19	HSD17B1
	RPS21	MMP23B	TK1	RPL36A	CLDN4	GAPDH	NEAT1	TPM1	ADAMTSL4	MMP2	FAM184A	PRSS8	COL5A1	CD24	PEBP1	MEG8	GABARAP	DAB2	LDB2	FUS	CD3E	CDC42SE1
	LGALS3	MGP	UBE2T	RPSA	SLC25A5	RPS7	HCST	ITGB1	TINAGL1	GJA1	RHOBTB1	GAPDH	RPL41	HNRNPH1	SLC25A6	CKAP4	HLA-E	PAPOLA	PTMA	ISYNA1	KLRB1	COL1A1
	TGM2	MFAP4	NUSAP1	RPLP2	MT-CO2	GSTP1	GPR34	CAVIN3	TFDP2	PLOD2	EZR	ACTB	PITX2	RPL27A	RPS15	FKBP10	GRN	UBE2B	IGF1	DDX5	ITM2A	RPS19
	MORC4	TCF21	WDR34	RPL22	PARP1	H2AFZ	HSPB1	PLAC9	CD46	ENPP2	MT-CO3	NRIP1	PTGDS	RASGEF1B	SLC25A5	MMP2	ATP6V1F	TAX1BP1	ITM2B	GRN	ACAP1	NME2
	PKIB	APOE	DNAJC9	GSTP1	RPS21	RPL3	CD37	NT5DC2	NFE2L3	PCDH10	MAN1A2	FLT1	MFAP4	LRP2	RPS8	CDH11	BRI3	AKR1B1	CRIP2	KRT7	CD7	MANF
	SERINC2	PLPP3	CENPX	RPS5	PRELID1	RPS23	S100A4	LAMC3	S100A11	MIR503HG	SLC26A2	KLF6	PMP22	RPL10A	LDHA	ACTA2	CD52	GABARAPL1	EPAS1	SRSF5	RPL35A	RANBP1
	LRPAP1	SEPTIN7	ORC6	RPL10	MRFAP1	TUBB	GPNMB	PXDN	SYNE2	LGALS1	PDLIM2	LY6E	PLAGL1	CGA	KRT18	KDELR2	MS4A7	SERF2	NPDC1	PERP	TRBC2	IFI30
	MT-ND4	PTGDS	APLP2	RPL37	SPINT1	PHLDA2	CSF1R	FLT1	TCEAL9	SERPINH1	HEXIM1	FLNB	THY1	RPL27	PERP	ENPP1	OAZ1	RPLP0	CALM1	RPS21	RAP1B	MYL12B
	ECH1	COL5A1	SYNE2	RPL6	ATP5MC3	RPL5	TPP1	PTMS	DLG5	ZEB2	HSD17B1	HMGB3	CAVIN3	HMGA1	RPL14	PALLD	DUSP1	RPS20	IGFBP4	MT-ND4L	EMP3	RPSA
	AKR1B1	PMP22	PARP1	RPL7A	PRDX1	RPL22	EGFL7	B2M	DAG1	APOE	TFRC	ADAM12	IFITM2	SPINT1	RPL13	HSPB1	EMP3	RPS16	MIR503HG	MESD	ZFP36L2	RPL27
	CLN3	FRZB	MKI67	RPL35	ECH1	RPS28	GABARAP	HES4	JUND	TIMP3	CD55	S100A11	PPP1R14A	RPLP0	SLC25A3	OLFML3	C1orf162	TMEM40	HYAL2	HSPD1	SEPTIN6	ANXA1
	FAM3B	COL5A2	IDH2	RPL27	KRT8	RPS29	SCN9A	MCAM	CRIM1	TGFBI	BZW2	HTRA4	CALM2	RPS3A	UQCRH	CAV1	HLA-DMA	RPL31	TJP1	DUSP9	JUNB	CTNNB1
	ANXA5	RARRES2	HNRNPAB	RPL36	COMT	RPL36	MAFB	MARCKSL1	PNISR	MARCKS	GSE1	IL1RAP	C4orf48	RPS10	RPL30	PLOD2	GLUL	RPS28	IGFBP5	KTN1	ICAM3	RPL17
	FOLR1	SRPX	TOP2A	RPL19	HMGN1	RPL27	IGSF6	NOTCH3	KANK1	DIPK2A	ZNF292	CD63	IGFBP7	RPL36A	RPL28	STXBP6	LIPA	ARID5B	SRGN	PRKCSH	TXNIP	IFI6
	ATP5MG	PCDH10	CDCA4	LDHB	PTGES3	RPL12	LAPTM5	EDNRB	FUS	SLIT2	SLC16A3	FXYD5	COL5A2	CDC42SE1	C1QBP	HSPB6	LCP1	CLIC3	IFITM2	ISM2	PPP1R18	EIF1
	DSP	MEG8	FBN2	VGLL1	DBI	HMGN2	GMFG	CTHRC1	SPINT2	MAN1A1	KRT18	LAPTM4A	PTMS	RPL8	KRT7	FTL	HLA-DQB1	MAP1LC3B	TMEM88	APMAP	CCDC85B	FOS
	CDKN1C	PLOD2	IFI6	COX7C	PSMA4	RPLP2	GYPC	SERPINH1	PDE4DIP	PLPP3	SEMA6A	MT1F	WFDC1	BEX3	LSM4	RABAC1	PLAUR	RPL27A	IGF2	ACADVL	EIF1	COL3A1
	RPL10A	ZEB2	PRDX2	RPL39	GCSH	RPS4X	NINJ1	VAMP5	UTRN	MEST	RBM47	LY6K	CFD	APLP2	RPL32	HAPLN1	C15orf48	GSTA3	LPAR6	GPAA1	IKZF1	B4GALT1
	HMGA1	PPIC	KRT18	ATP5MG	FXYD3	RPL30	FCGR1A	ID4	AGL	FRZB	FDX1	HAPLN3	S100A4	SYNC	RANBP1	KCNQ1OT1	RNASEK	PDLIM2	ADCY4	AKAP9	RPL11	H19
	CLTA	MEST	SRSF7	RPL24	XAGE2	RPL28	ACTB	CD81	TAF1D	PDGFRA	MLLT1	FHL2	AGTR1	HSP90AB1	ATP5MC3	CREB3L1	MSR1	RPL24	CLDN5	COX6A1	CD247	RPS15A
	MBNL3	SELENOM	HNRNPDL	RPL37A	ANP32B	SNRPG	ATP6V0C	LAMA2	MT-ND6	MT-ND1	ARG2	RFK	IL6ST	SIGLEC6	PKM	CNN3	SPI1	HSPB1	C1orf54	CALR	TSC22D3	RPL11
	ANXA2	TIMP3	SNRPD1	RPL5	HNRNPA3	S100A11	HLA-B	CD99	ACSS1	F3	LYPD3	ISM2	OLFML3	RPL19	RPL27	ACTG1	HCST	SIAH1	FCGR2B	KCNN4	SLA	RPS23
	SLC26A2	HLA-B	ANP32B	SMAGP	CHCHD2	RPL19	AP1S2	BGN	SLC2A1	ADAMTS1	DAB2	S100P	TGFBI	DNMT1	SNRPE	H19	SAMHD1	EIF4A1	GIMAP4	HNRNPU	RPL32	LGALS1
	SERPINF1	MMP2	H2AFX	RACK1	ENO1	RPL9	CST3	ITM2C	SPINT1	ADAM12	BACE2	VASP	CHN1	RPL13A	CCNE1	FLNA	SOD2	RPL7	IGFBP2	NASP	SPN	CLDN4
	TSC22D1	RSPO3	EFEMP1	RPL9	MT-CYB	RPL37	MRC1	FERMT2	ITGB4	EMILIN1	WSB1	CLTB	RPL10	KRT8	CHCHD2	MFAP4	ARHGDIB	ATP6V0C	AP1S2	KRT8	CTSW	SSR4
	IDH2	F3	MT-ND3	XAGE2	LY6E	PFN1	SH3BGRL	CCDC102B	ITGA6	SPON1	NECTIN4	LRRFIP1	CDH11	RPS17	HSPD1	LMCD1	ASAH1	FXYD3	NNAT	SLC39A1	IFI16	RPL35
	CLIC3	PDGFRA	DUSP9	UBA52	LDHB	RPL18	CD59	THY1	FTX	MRC2	ESRRG	CEBPB	TNNT2	AL121944.1	SNRPB	LOX	HLA-DRB5	NACA	B2M	TUFM	RPS15A	MORF4L2
	APP	VTN	LY6E	NACA	SOD1	RPL29	ALOX5AP	PPIB	CD24	SVEP1	AKAP9	VGLL3	TPM1	HSPD1	RPL21	CRABP2	MALAT1	TINCR	IL33	N4BP2L2	MYO1F	ACTB
	CYSTM1	IFITM2	CENPU	SNHG29	DNMT1	RPL24	TREM2	LAPTM4A	BSG	LAMA2	BRAF	XAGE2	COX4I2	NCL	SPINT2	ADAMTS1	FXYD5	SERP1	JAM3	SLC27A2	CD2	C1orf56
	TECR	LAPTM4A	LSM4	KRT7	NDUFA4	UBA52	RNASE1	GUCY1A2	AKAP9	PLAC9	AAK1	PLIN2	EMP3	KRT7	NACA	MARCKS	S100A9	GDF15	MRI1	EXTL2	RPL13	GDF15
	MT-ATP6	IQGAP2	MT-ND5	EEF1G	TUBA1B	SNRPD2	MS4A6A	MARCKS	ARID3A	SRPX	GATA3	COL4A2	OGN	RPS20	RPL35	MATN2	ATP6V0C	NFYB	TFPI	ITIH5	LCP1	RPL37
	RPS16	COL4A2	HMGN3	FTH1	COX6A1	RPL37A	TIMP2	ACTA2	IFI6	TCF21	IFI6	GCSH	COL15A1	RPL37A	XAGE2	CD63	CD44	RPS6	GIMAP7	SFPQ	CD74	PGF
	RPS12	HLA-A	UBE2C	GAPDH	MT-ND4	CKS1B	CD53	MT-CO2	TFAP2A	ITGA1	NUFIP2	MYCNUT	ENPP1	RPSA	RPS24	VCAN	RGS1	RPL18	FLI1	CD46	APOBEC3G	RPL5
	NDUFB9	BAMBI	DHFR	RPS11	ISYNA1	FTH1	SAT1	GPR183	TBL1X	WNT2	RASA1	GLIPR1	LAPTM4A	RPS13	ANP32B	CD9	CD63	RPL30	ARGLU1	RRBP1	RPS19	FDX1
	MT-ND3	CLMP	PAXX	FAU	MT-ND1	SNRPD1	ATOX1	HSP90B1	UBE2H	CKAP4	CRYBG1	EFHD2	MAP1B	TCEAL9	RPL36	GPX8	NFKBIA	UBA52	TAX1BP1	ANXA1	LCK	RPS4Y1
	MIR205HG	S100A4	RRM1	SERF2	BIRC5	TMSB10	MEF2C	CALU	RASA1	CTHRC1	GREM2	BCAR4	SPP1	CENPF	SET	MRC2	MAFB	SKP1	KIF5B	RBM39	PLAAT4	FXYD3
	TCEAL9	FBLN2	MCM7	RPL29	NFE2L3	RPL10	A2M	MYL9	MLLT1	BMP5	TINCR	PTN	VAMP5	TINAGL1	PRDX2	FBLN2	CD53	RPL10A	EXOC6	PDIA4	TRBC1	SLC22A11
	MPP1	MAN1A1	RPA3	PEG10	DSP	RAN	MGST2	ADAMTS18	FRMD4A	STC1	MT-CO2	SAT1	CD63	L1TD1	KRT8	TPM1	LY96	S100A9	CREM	CDH1	RPS6	HSP90AA1
	SLC27A2	DIPK2A	BIRC5	PRDX5	SLC27A2	CALM2	SDCBP	CALR	POLR2J3	FKBP10	MAFF	ITGB1	PPIC	MORC4	RPS15A	CST3	CTSH	RPS19	A2M	EGFR	CD44	ENO1
	GNAS	CNN3	SMC3	RPL23	DCXR	RACK1	ITGB2	MT-CO1	GRAMD2A	MDK	SERP1	PKP2	REN	RPS6	NDUFA4	F3	FCGRT	EDF1	PLVAP	LAMA5	KLF2	KISS1
	ERP29	COL21A1	PEBP1	MGST3	MT-ND2	VGLL1	RNASEK	GJC1	ISYNA1	CFD	ARHGAP24	F11R	NDUFA4L2	RPL7	RPS12	ITGA1	S100A8	RPS29	STMN1	HSPA8	IFITM2	RPL24
	SMS	DES	AURKB	RPL28	SMAGP	PRDX2	ARHGDIB	PAG1	DYNLL2	ARGLU1	APMAP	MT1E	DES	RPL30	RPL10	CRISPLD2	S100A11	TBX3	NOTCH4	CLN3	TBC1D10C	RPS12
	PNP	MIR503HG	PGP	BEX3	HNRNPR	RANBP1	PFDN5	CHN1	EFEMP1	MT-ND5	H3F3B	PLCL2	RARRES2	PARP1	IMPDH2	SPON1	ISG15	PAIP2	CAVIN1	HNRNPA2B1	CD53	TUBA1C
	SIGLEC6	ADAMTS1	TUBB4B	SNRPD2	SNRPB	DBI	CALM3	FAM162B	DSC3	CD248	SLC3A2	BRI3	TFPI	HSP90AA1	VDAC1	MAN1A1	SH3BGRL	MTHFS	MYL6	ADGRG1	PTPN6	P4HB
	ITIH5	HSD17B2	RPS16	UQCR10	MPC2	HSPE1	LST1	PCDH18	ERVW-1	FSTL1	KIAA0040	ADM	TXNIP	TFAP2C	TIMM13	CAVIN1	CD84	CLTA	DIPK1B	FOSB	LYL1	EIF4A1
	PRDX1	ADAM12	CDT1	VAMP8	PSMA2	HINT1	DUSP1	TBX2	LGR5	TCF4	DSP	GJA5	COL14A1	IGSF10	HSPA8	CAVIN3	SNX10	LGALS13	KLF2	CD151	FERMT3	ATP6V0C
	BRD4	MYL9	MT2A	PRDX1	CENPF	LDHB	ATP6V0B	ZEB2	CCNL1	FBLN1	ERVFRD-1	P4HB	CNN3	GAPDH	PPA1	OST4	HLA-DQA1	BZW2	RGCC	SLC26A2	CCL4	HSPA8
	SLC25A5	BMP5	PSIP1	TMSB10	PSMB2	MT2A	KCTD12	PDLIM5	ANXA1	VCAM1	HMGB3	ABCA7	TCF21	DSP	SERBP1	TIMP3	KLF6	CMAS	CRHBP	CCR7	PLEK	KRT7
	PRDX2	RABAC1	C19orf48	CLTA	TRMT112	SNHG29	HNMT	EGFLAM	LINC01949	TIMP1	MAP1LC3B	ENG	FKBP10	RPL7A	EEF1D	CSRP2	ACP5	SLC25A5	GAP43	WSB1	KLRK1	RPL34
	CDO1	AEBP1	RAN	COMT	NUCKS1	HMGA1	PLD3	EMILIN1	DOCK8	HLA-A	SLC38A9	MIF	SELENOM	RPL36	XAGE3	ITGB1	GMFG	NDUFA6	SOX7	LMAN2	CLEC2B	MYDGF
	KRT23	STC1	GNAS	ECH1	TXN	EEF1G	CD99	TACC1	SF1	AEBP1	SPINT1	TMED10	GNG11	ZNRF3-AS1	PTMA	SPATS2L	RNF130	MOB4	ADGRL4	KRT19	PLAC8	BTF3
	MPC2	SPON1	CLSPN	KRT8	RPS5	POLR2L	PLA2G7	EZR	DSC2	NR2F1	FXYD3	AIF1L	NID2	AKR1B1	SNHG5	RCN3	ATP6V0B	RAP1B	SLC2A1	IER2	TUBA4A	RPL6
	DDB1	CHN1	HINT1	RPS26	TSPAN13	LSM3	TUBA1A	NID1	MYOF	PTGDS	RBMS1	MYADM	BAMBI	AC022137.4	SNHG29	COPZ2	BCL2A1	ZFAND6	RBP1	PARP1	ISG20	SRI
	VSIR	SERPINH1	PEG3	SKP1	CACYBP	RPL39	HSPA1A	MYO1B	PSAP	COL21A1	DUSP9	ANXA4	JUNB	MBNL3	RPS20	HAND2	COTL1	ERVFRD-1	FDPS	SIGLEC6	CST7	PERP
	ADIRF	CAVIN3	ISYNA1	RPL38	CMTM6	PCNA	CHCHD10	HIGD1B	CTNND1	SPTBN1	TINAGL1	ANXA1	SRPX	PPP1CB	SRSF3	TPT1	PYCARD	RPS11	ACVRL1	LSR	RIPOR2	TINAGL1
	TCAF1	FTL	KPNB1	HMGA1	ATP5IF1	GGCT	IFI16	GAS6	SLC13A4	KCTD12	FAM13A	PLK2	COLEC11	RPL26	RPL22	CRYAB	CD81	RPS5	HLA-A	CTSC	IL7R	PPIA
	RPSA	HAND2	HNRNPA3	RPS9	SLIRP	CKS2	RGCC	LIMS1	PBX1	OGN	SLC19A2	B2M	SNAI2	HNRNPA1	PA2G4	PPIB	PLEK	NUCB2	PCDH17	CAPN1	ELF1	H2AFZ
	ECHS1	NRP2	SPINT1	UQCRB	RPS12	SNRPE	NOP10	COL5A2	DUSP9	LTBP4	APLP2	HSPA2	SDC2	ADRB1	CYC1	FSTL1	MNDA	LCMT1-AS2	PCSK5	MIR205HG	MATK	SLC40A1
	PDE4DIP	WFDC1	TMPO	ANXA5	ATP5F1A	RPS9	FCGR2A	MAGED2	ALDH7A1	HAND2	KRT8	GATA2	ITGA1	RPL6	FTH1	FRZB	LGMN	CYP19A1	MGST2	LRP2	PTPN7	MIF
	CD46	ADAMTS5	VGLL1	EEF1A1	JPT1	CDK1	LIPA	H2AFJ	TRIM33	CRISPLD2	EIF1	RALBP1	VTN	PKIB	MDH2	FILIP1L	FYB1	PSMB1	ID3	CTSV	STK4	PDLIM2
	HSPD1	MAP1B	ATAD5	NDUFA4	GGCT	NDUFA4	CYBB	CRIP1	CLIC3	HYMAI	B3GNT5	ANXA2	SERPINH1	RPL18	PTGES3	PDLIM7	STAT1	KMO	PLXND1	PKP3	TSPAN32	PGAM1
	NDUFA13	TXNIP	H2AFV	AKR1B1	MBNL3	ENO1	MARCKS	CCDC3	NIBAN2	NFIA	XAGE3	UPP1	FABP5	FANCD2	PFN1	COL6A3	YBX1	RPS24	ITGB1	BCAP31	LAT	AKR1B1
	TUSC3	CALM2	GGH	ATP5MC2	HNRNPD	KRT7	ATP6V1F	GUCY1B1	TFRC	DDX17	SIAH2	AFAP1	PDLIM7	TFDP2	PRELID1	CD99	HLA-DMB	RPL8	NRP1	VCP	RPL29	RPS21
	PSMB1	OGN	TECR	RPS10	NASP	ATP5MG	BMP2K	KCNK3	MYORG	LIFR	TACC2	ATF3	ACTG2	AC025175.2	TOMM6	EMILIN1	SDCBP	UBE2A	MIR181A1HG	ITGA6	RPS15	TUBB4B
	EXTL2	PDPN	LMNB1	RPS21	SFPQ	RPL23	SNX3	TMEM141	METTL7A	TGFBR3	BTG1	CAPG	APOD	AC064836.4	PKIB	TTC3	FCGR3A	SEM1	JAG1	LY6E	TGFB1	GCM1
	GCSH	SERPINF1	SLBP	HMGN3	NDUFB9	NUSAP1	FABP5	SEPTIN11	MET	MAP1B	PRRC2C	SLCO4A1	LAMA2	AL136979.1	PGAM1	LOXL1	RGS10	MLLT1	RESF1	CPVL	ABRACL	BCAP31
	COX6A1	LOXL1	MCM3	DUSP9	CDKN3	UBE2C	SRGN	SEMA6D	TMEM150C	RUNX1T1	EPHB4	FSTL1	MARCKSL1	RPLP2	RBM3	AHNAK	ARPC3	EZR	CCND1	DLG5	PRF1	GADD45G
	CTSL	LAMA2	CARHSP1	PRDX2	SNRPF	RPS26	IFITM2	DCN	FBN1	PLTP	CCNDBP1	PTGES	CRYAB	DUSP9	PABPC1	ACTG2	LGALS3	PDCD4	HES1	CCDC47	ZBTB16	CEBPB
	GSTK1	STXBP6	SMC2	PEBP1	PSMA7	MIF	SPI1	PTPRD	SLC38A1	MMP23B	TCF25	SDCBP	MMP23B	RPL35	EIF4A1	FBLN1	LILRB4	ARL4A	IL32	DSC2	TLE5	APOC1
	TENM3	TNNT2	HSPD1	DBI	LSM5	UQCR10	PTMS	POSTN	HNRNPA2B1	PTK7	HDAC5	SDC4	EIF4EBP1	NPM1	NCL	HGF	LGALS9	RPS15A	CD99	HSP90AB1	MBP	ARPC3
	CSF2RA	RRBP1	WEE1	KRT18	PRDX5	LSM4	MKNK1	PTN	GTF2I	CCDC144A	SLC19A1	TUBA1C	CD99	RPS5	RPL23	TXNDC5	CRIP1	FAR2	NID1	MET	FMNL1	EDF1
	RPS5	FBLN5	HNRNPR	SOD1	SNRPD1	HNRNPA1	RTN4	OAZ2	YAP1	MGP	PDCD4	OPN3	CCN2	RPL5	RPS4X	TSPO	ID2	RAB9A	CD44	FOLR1	C9orf16	KRT23
	ANXA1	DKK1	EZH2	ATP5PF	RPA3	PCLAF	MALAT1	GNG11	RBM47	VTN	CEBPA	TYMP	DIPK2A	MPRIP-AS1	SNRPD1	JUNB	RNASET2	PSMC4	RAPGEF5	HEXB	CD48	PSMA7
	CRYBG1	SLIT2	MGST3	CD24	ATP5MG	BIRC5	RASSF4	COLEC11	LRP2	OLFML3	PIK3C2A	ITM2B	FXYD1	SPC24	H2AFZ	KDELR3	EFHD2	SERPINB2	TPM3	SH2D4A	WAS	TUBB
	PEG3	ECRG4	SNRPB	NDUFB2	PKIB	PTTG1	CCL2	CD248	NHLRC3	NRP2	LINC01949	GCM1	COL4A2	SMS	RPS23	PMP22	NCF2	OAZ1	CLEC14A	TECR	ICAM2	PLIN2
	KCNN4	TPM2	CHAF1A	ATP5MF	ANXA5	COX7C	CD5L	CAMK2N1	LGR4	RAP2B	ZNF703	SSR4	RPL23A	NFE2L3	SRSF9	RCN1	GLIPR2	OVOL1	TNFSF10	LGALS3BP	SH3BGRL	ABCA7
	BCAP31	SELENOP	PA2G4	CLIC3	DEK	RPA3	PLEK	ANXA6	VWA1	CHN1	RAB11A	HSD3B1	RSPO3	NASP	PPP1R14B	GJA1	ZFP36L2	RPS18	P2RY1	TENM3	JAK1	FABP7
	S100A11	HAND2-AS1	COMT	UBB	RPL7A	TUBB4B	HLA-E	MAP1B	FOXP1	PPIC	MIR22HG	HTRA1	EFEMP2	AC092171.3	RSL1D1	CALU	TIMP2	MAFF	SLC9A3R2	SLC39A10	CXCR4	HSP90AB1
	MESD	MT-ND4	TCEAL9	ADIRF	RPS3	TUBA1C	EFHD2	NES	ADIRF	FLNA	GNAS	CLDN19	HLA-B	ANXA5	EIF3F	EFEMP2	LAIR1	ABHD5	NFIB	HOOK2	TPM3	BZW2
	KRT19	SPTBN1	YWHAH	MIF	AKR1B1	ATP5MC3	GLIPR1	MT1E	NUFIP2	AHNAK	DHX36	SYT8	S100A10	ABCB1	COX5A	WFDC1	MARCKS	RPS3A	MDK	TMBIM6	S1PR4	EEF1B2
	ERVW-1	BASP1	KRT7	CYSTM1	POLR2L	RPS21	BST2	CYBA	NCOA3	DES	EPAS1	GPR146	LOXL1	AC244213.1	DANCR	C12orf75	CHCHD10	RPS17	DLEU2	IGDCC3	RGS10	TMED9
	SLC39A1	HSPB1	CTNNAL1	ATP5PO	FAM3B	SLIRP	UCP2	MT-ND4	NUDT4	RBMS3	MAP1LC3A	NLRP2	DKK1	AC091607.2	RPS14	OSTC	SMIM25	HIGD1A	ADAM15	SLC19A1	GTF3A	RPS25
	TFAP2A	PALLD	ASF1B	CSTA	CCNB2	FAU	RAB32	GJA4	LRP5	CLMP	PDE4DIP	DSTN	PDGFRA	RPL29	PDIA6	NME4	TNFSF13B	PHOSPHO1	ADGRF5	SF1	EEF1D	HLA-G
	ATP5F1C	NDN	SMC1A	HSPE1	CDC20	ATP5MF	CAPZB	TGFB3	ECHDC2	LOXL1	TFAP2A	FOSL2	FAM114A1	SMAGP	CCT6A	COL9A3	PTPRC	ATP6V1G1	SH3BGRL3	HACD3	ARHGAP30	EIF5A
	SLC25A6	CCDC80	CD24	S100A6	PEG3	PTGES3	FCGR1B	BAMBI	FAM184A	PMP22	EPS8L1	SLC39A8	IGFBP6	CD2AP	RPL41	LINC02802	CXCL16	MAP1LC3A	LIFR	AGL	FNBP1	GNG5
	ATP5MC3	TCF4	NFE2L3	PKIB	SNRPE	YBX1	RNASET2	TJP1	EML4	LAMB2	TOX4	PDIA6	HLA-A	LDHB	RPLP1	VTN	CCDC88A	FAM104A	CLIC1	GPC1	GIMAP4	ARID3A
	PRDX6	TGFBR3	ZDHHC12	AC092718.6	ALDH7A1	TMA7	BLVRA	OLFM2	AAK1	DIO3	OVOL1	DOCK5	NDN	VGLL1	ATP5F1B	SEPTIN7	PSMB9	RPL11	GBP4	DSC3	OCIAD2	PSENEN
	UTRN	MFAP2	HSPE1	NDUFA11	TPI1	EEF1B2	C4orf48	TPPP3	CROT	DPP4	IDS	GRB2	STXBP6	AL031714.1	NME1	IL6ST	PLXDC2	CCNDBP1	RHOB	SRSF7	TAOK3	TFPI2
	QPRT	GALNT1	CCNA2	ATP5MC3	TSTD1	TYMS	ARPC3	MYL12A	USP25	DKK1	PEG10	TNFAIP3	EPB41L2	SLC26A2	ATP5F1A	IFITM2	LIMS1	RBM8A	SPTAN1	PHLDA2	ZFP36	MT1E
	ARL6IP5	WSB1	DSP	TCEAL9	TECR	XAGE2	ADAP2	RHOC	TLE4	PDLIM5	ATP10D	GPX4	ID4	ITGA6	TKT	S100A13	SGK1	HEXIM1	ROBO4	DAG1	RPL30	RNASEK
	SLC13A4	RUNX1T1	MBNL3	FXYD3	HNRNPK	SNRPF	IGFBP4	COLEC10	ITGB5	LTBP1	UTRN	XBP1	RPL21	GCNT4	EEF2	FMOD	FAM49B	RPL10	PALMD	GOLGA4	GP1BB	RPL30
	DLG5	SEC62	TINAGL1	SLC25A5	ISCU	PRDX1	HLA-A	DBNDD2	AC092718.6	NEAT1	BSG	CA2	RBP1	RPL38	ACTG1	FKBP11	IER3	RPL35A	JCAD	DDB1	PRKCB	SRSF2
	SMARCA2	NR2F1	CACYBP	TMA7	ERH	RPS10	MCOLN1	MT-ATP6	GRHL1	ADGRA2	VGLL1	PFN1	HBA2	CLDN4	SNRPG	ACTN1	CYBB	RPL15	FAM43A	SERPINF1	CKLF	TUBA1B
	HEBP2	FXYD1	LSM3	IFI6	RPL10A	SLC25A5	ABCG2	MEG8	CEMIP2	COL16A1	TUSC3	LDHA	STC1	PARD6B	C19orf48	MFAP2	RHOA	BCAR4	LXN	ILVBL	SEPTIN1	C12orf75
	COX7C	FBLN1	TFDP1	PRDX6	TCEAL9	GCSH	PYCARD	SNAI2	CLIP1	FBLN5	GSTA3	SLC2A3	EMILIN1	HMGB1	EEF1A1	SRPX	ARPC1B	ZNF703	HACE1	PRRC2C	SNRPN	EEF1G
	SIAH2	COL6A3	HNRNPU	NPM1	LSM7	CHCHD2	RNASE6	TGFB1I1	DDX17	CD36	VAV3	NPC2	PLOD2	TMED4	RPS21	PLAGL1	SERPINA1	EIF4G2	KANK3	SRSF2	RPL13A	RAN
	PSMB6	MT-ATP6	CENPM	ATP5PD	GSTO1	NACA	NCF4	GUCY1A1	KRT18	HLA-B	SPAG9	TNNI2	IGFBP2	SLC27A2	RPL27A	AEBP1	CCL3L1	RPS4X	LGALS1	GGH	MBNL1	MT-CO1
	RPL18	EMP3	SRSF3	LGALS3	HNRNPDL	UBB	OTOA	CKAP4	MORC4	NID2	KMT2C	RGS16	CCDC68	HBG2	EIF3L	LASP1	LTA4H	MAOA	CAVIN2	DEGS1	RPS27A	NPM1
	ECI2	MT-ND3	VWA1	COX6C	ADI1	GSTO1	GLUL	VASN	LAMC1	RRBP1	ATG9B	TNFSF10	TUBA1A	MTA2	P4HB	TNNT2	GCHFR	ATP6V1F	DIPK2B	PNN	IRF1	TAGLN
	CTNNAL1	LINC02802	MAD2L1	SLIRP	PSMA1	PA2G4	CCR1	AKAP12	FOSB	TMEM106B	NECTIN3	DSC2	RPL13A	AMFR	HINT1	S100A4	TXNIP	KIAA0040	ZEB1	GOLGB1	PABPC1	OSTC
	ACSS1	TSPAN4	RAD21	POLR2L	OAZ1	TPI1	EVI2A	MFGE8	MPHOSPH8	ADAMTS5	AP2A1	MBD2	GATM	KRT19	CACYBP	TUBB6	MS4A6A	PKIB	RNASE1	DDOST	YBX1	GPX3
	LARGE2	CADM3	ATP5MC1	PSMB6	SEM1	TXN	TMIGD3	MT-CO3	PARP1	RND3	RAB9A	CALD1	VCAM1	MORC2-AS1	HMGB3	CNN1	RNASE1	NRBF2	CLEC1A	FOS	PFN1	ANXA5
	RACK1	CRISPLD2	CENPF	FKBP3	CKS1B	PRELID1	ADAM9	KCNK6	SYT7	B2M	SERPINB2	PTBP3	AEBP1	IAH1	TUBB	CERCAM	AP1S2	BTG1	SMAD1	LARGE2	PSMB10	KRTCAP2
	STARD10	PRLR	ATAD2	DCXR	LDHA	ATP5MC1	MT-ND2	EFEMP2	NF1	HAND2-AS1	CDYL	MBNL2	MMP2	S100A9	ARPC1B	P4HA2	CORO1A	RPL12	TM4SF18	HSPA9	GNLY	CHCHD2
	MSI2	SLC16A10	USP1	SLC25A6	RPS17	NME2	STX7	REN	NEAT1	ATP1B1	SLC49A4	COL27A1	HBG2	ACBD6	HMGN1	GSN	SLC7A7	YPEL5	AFAP1L1	TMEM59	EVI2B	STMN1
	PSAP	SVEP1	SRSF10	COX4I1	ATP5F1C	UQCRQ	TPM3	RERG	MMP14	CADM3	SYNE2	SEMA4C	MFAP2	SHTN1	MIF	FILIP1	ATOX1	PSMA1	HHEX	FTX	RASGRP2	ASCL2
	MRFAP1	RBP7	UBE2S	UQCRH	RPL8	NDUFS5	IGF1	HTRA3	IDH1	RSPO3	APP	LITAF	SPATS2L	AMOT	NHP2	ADAM12	BST2	SIAH2	ACTB	RNMT	ITGA4	SELENOK
	RPS27A	VCAM1	IGDCC3	RPL36AL	ADIRF	LSM5	MT-CO1	TMEM35B	ARGLU1	NID1	PEG3	GPX3	ENPP2	MT2A	PHB2	TNFRSF12A	CCL4	BPGM	TBC1D4	CSF2RA	UCP2	HSPB1
	EIF3G	TMEM98	BRCA2	SNHG5	PDLIM1	SOD1	RNF13	LURAP1L	NRK	BAMBI	CMAS	AP3S1	NR2F1	AC093690.1	HNRNPF	FXYD1	ZFP36	ATP6V1E1	TUBA1A	ADAMTSL4	IKZF3	RAB11A
	BEX4	CEBPD	DIAPH3	BTF3	PFN1	H3F3A	GAPLINC	CAV1	MPP7	PDPN	ARL4A	TUBB6	NME4	MAP7D2	UQCRFS1	ACTB	GLIPR1	EEF1G	GNAI2	XRCC6	PSMB8	PKM
	ERGIC3	EPB41L2	CENPN	NDUFS5	PSMB7	UBE2T	RNF130	COL4A5	RERE	EPB41L2	SIN3B	MAN1A2	FILIP1L	HERC5	FBL	FAM114A1	CD83	RPL32	CALCRL	CANX	LST1	MRPL23
	SEMA6A	CRYAB	ASPM	SMS	TSC22D1	PPIA	ANKH	MEF2C	DLG1	FMOD	CSNK1A1	CMTM3	SFRP1	RPL13	EIF5A	MAGED2	ATP6V0D1	RNASEK	MMRN2	DDX46	CD27	HMGB3
	PISD	SEMA6D	SNRPF	UQCRQ	RBBP7	CCNB1	FAM20A	AC100793.2	ADAMTS6	GSN	DDX5	MXRA8	HSD17B2	AL590822.2	ARPC2	ZFP36	PPT1	RPS8	COL15A1	CLDN7	GZMM	HSPA2
	FBLN1	LMO7	RPSA	MYL12B	TOMM6	CENPW	CLTC	CLEC11A	HOOK2	LMO7	NUPR1	EPAS1	RPL28	RPS28	STOML2	FIBIN	TMEM176B	CSTA	MAGED2	ITGB1	FCER1G	SPARC
	ADGRG1	CKAP4	FEN1	S100P	LSM3	CCNA2	TM2D2	NME4	KDM5B	NFKBIZ	FAM104A	CD276	TIMP3	FXYD3	TALDO1	PPDPF	NOP10	MIR22HG	KL	LAMC1	EVI2A	IFITM3
	FAM89A	TSPO	COX5A	MPC2	COX7A2	TK1	LINC01094	TUBA1A	ATP6V1C2	IL1R1	ARHGAP18	PLOD1	RPS18	AL133453.1	TUFM	SEC61B	UCP2	RAB1A	JUNB	SPPL2A	DAZAP2	KCNN4
	ECHDC2	ITGA1	ALDH7A1	ECHS1	HNRNPC	ATP5IF1	GNAI2	FKBP10	ERVH48-1	SON	MT-ND4	PXN	COX7A1	NUSAP1	UBA52	IGF2BP2	FBP1	RBM42	VWF	ARID3A	RPL28	RPL13A
	TPST2	MAGED2	PDLIM1	SEM1	FBN2	PSMA4	UBC	MIR503HG	MFSD4B	MFAP2	NRBF2	CALU	SH3BGRL	CHRM3-AS2	AURKAIP1	LRRC32	MTDH	RPL18A	WWTR1	TLE4	ODC1	COX4I1
	MSX2	CRABP2	DBI	ATP5ME	MESD	COX8A	RENBP	HSPB1	AZIN1	ISM1	MT-ATP6	PKM	FBLN2	GRAMD2A	AHCY	PLD3	CD36	DNAJB9	PKN2	MMP14	HOPX	SIVA1
	CAMK2G	PLAC1	CDH1	ROMO1	PPP1CA	UQCRH	GRN	P4HB	USP53	CREB3L1	MBNL3	CITED2	HBZ	TMEM30B	HNRNPD	PITX1	CD48	BACE2	ZFP36	JUN	NOP53	HNRNPA1
	TBL1X	PLTP	GSTO1	TSTD1	PSMD7	CDC20	CORO1A	PCOLCE	SSBP3	TTC3	CPEB4	CAPN6	SPON1	MET	RPL12	TMEM98	CLEC7A	COX7B	NT5E	ERGIC3	KLRD1	PSMA2
	FOXO4	CSRP2	TGM2	HNRNPA1	CALM1	NDUFB2	MT-ATP6	MT-CYB	SERINC2	PALLD	PIM3	ARPC1B	TMEM98	LYSMD1	PHB	MYADM	MGST1	SGK1	SOX17	GPBP1	RGS1	ACTG1
	RPIA	FILIP1L	CCDC34	ATP5IF1	SNHG3	COX5A	SLCO2B1	ITGA9	PTPN14	MYH10	PAIP2	LGALS3BP	F3	NOCT	TOMM40	SLC18A3	AC020656.1	CGB3	NTS	DPP4	UBE2L6	CENPX
	HSD17B1	TMEM106B	PRELID1	GAS5	LMNA	ATP5ME	EIF1	EBF1	HIC2	MATN2	ATP6V1G1	APOC1	CRABP2	ISYNA1	HNRNPR	ARF4	SMCO4	SLC13A4	CDH13	SMARCA2	GATA1	TIMM13
	SOD1	CD36	FXYD3	CDO1	PSMA6	NPM1	NCKAP1L	CYTOR	DSG2	CHD9	NFYB	YWHAZ	PITX1	EXTL2	NDUFAB1	P3H4	LAP3	TBPL1	CYYR1	HELLS	ARHGAP15	ID3
	TSPAN13	TTC3	GAPDH	ATP5F1C	CCNB1	PSMA7	MFSD1	SQLE	MT-ND4L	IQGAP2	MT-CYB	CDK7	SEMA5A	AC005726.5	CCT4	HSPA2	H2AFY	RACK1	SLC38A2	EMC10	RUNX3	RPL22L1
	TSTD1	RAP2B	NUCKS1	COX7B	COX5A	CENPN	RAP2B	CARMN	FRMD6	TNNT2	CLIC3	GM2A	LHFPL6	FAM184A	EIF3K	P3H1	FPR3	PIM3	TIMP1	DSG2	DOK2	DNAJC3
	EIF2AK1	HYMAI	CDCA5	ECI2	SLC39A1	CACYBP	ARRB2	SPATS2L	DOCK9	DNM3OS	FAR2	N4BP3	SLIT2	CDC42	HEBP2	EIF4EBP1	GSN	TDRP	PRXL2A	ANXA2	MSN	COX7B
	ISM2	CD81	SET	HINT1	XRCC6	NDUFA6	TLR4	CRIP2	STARD10	LRP1	C1orf21	CLIC3	PLP2	CROT	CYCS	CAV2	TPM3	ALAS1	MAGI1	UTRN	WIPF1	COX6A1
	ASS1	CD248	BRCA1	PSME1	GNAS	MAD2L1	SNX2	LAMB2	TFCP2L1	MAGED2	MOB4	CLIC4	TGFB1I1	HMMR	VGLL1	DSTN	HLA-DQA2	OTUB2	ZBTB20	LAMB1	AIF1	RPL7
	CCNDBP1	CREB3L1	RPLP0	SNRPG	TOP2A	TRMT112	CTSL	MAP4K4	ARHGAP23	SLC16A10	ZFAND6	PSAP	RPL35A	CDKN1C	HNRNPC	IER3	ATP6V0E1	HSPE1	ITM2C	CLIP1	SLC2A3	HNRNPK
	DCXR	GPX8	TSPAN13	UBL5	PSMA3	ANAPC11	SNX6	ADAMTS9	RAB11FIP4	IGF2BP2	LGALS16	MMP14	ACTG1	IQGAP3	CNBP	AP3S1	TPP1	GREM2	SEC14L1	SLC52A2	COTL1	ERP29
	EEF1G	LTBP4	RFC3	EIF3G	ERP29	DCXR	PYGL	TAGLN	EPHB4	FADS2	RAI14	SSR3	MEG8	COCH	APRT	CD81	EPSTI1	TPT1	SOX18	SLC38A1	BCL11B	SNRPB
	BTF3	ACTA2	HNRNPA1	WDR83OS	SRSF3	CCNB2	SIGLEC1	TPM4	RPL37	PAMR1	MT-ND1	CD9	FIBIN	SMARCA2	CALM1	COL16A1	GPSM3	SAP18	MYCT1	CCNL1	PRKCQ-AS1	MUC15
	GSDME	EFEMP2	RPS19	ISYNA1	PDIA6	DUT	SLC18B1	WNT6	RSRP1	TXNIP	C1GALT1	TXN	HTRA3	MARVELD3	MZT2B	MIR503HG	SLC11A1	NAGK	PDGFB	ACSS1	CNN2	PSMB1
	MT-ND5	FILIP1	RPL7A	PSMB1	MT-ATP6	YWHAH	APLP2	MDK	CDCA7	SLC18A3	SGK1	MYCN	MAGED2	ADIRF	PRDX4	CNN2	SDS	LYPD3	RFLNB	TAF1D	FLI1	LY6E
	RPS13	SPATS2L	CALM1	NDUFB4	ATP5F1B	RPL4	CCL4	EPB41L2	FAM120A	IFITM2	DHRS9	MT1H	HSPB6	BEX2	TOMM20	KRTCAP2	BLVRB	LDHB	CNN3	ITGAV	LIME1	RPL36
	COX4I1	FLNA	RAD51C	PSMA4	NPM1	ANXA5	UQCR11	PDLIM7	ZFAT	JUNB	GOLGA4	ERO1A	TSPO	SCN1A-AS1	EIF3E	P4HA1	ADA2	ADHFE1	HSD17B2	FUCA1	GZMB	HLA-C
	RPL7A	FIBIN	CALM2	PFN1	NDUFA13	RPL38	HMOX1	CD9	SP6	SEMA6D	GATA2	ASPSCR1	MYL6	DSC3	TOMM7	ISLR	ALOX5AP	RPL19	THSD1	TEX264	DDX5	FXYD5
	SYNE2	SLC40A1	EGFR	RPL4	PSMB3	PSMB6	KLF2	CCDC92	BMP7	TBX2	MAFK	PDIA4	RPL35	PRC1	SRM	FSCN1	JUNB	CHMP2A	LIN28B	ITGB4	CDC42SE2	HSPE1
	BBX	MATN2	CHCHD2	NDUFA6	ANP32A	SIVA1	LY86	PITX2	FSTL1	PRLR	DNAJB9	AC211486.5	RCN3	CDC42-AS1	RPL24	EBPL	MFSD1	RPS23	DDAH2	PRKDC	CD96	LSM3
	SLC6A4	EIF4EBP1	MZT2B	RPIA	H3F3B	TOMM6	C3AR1	CCND1	MYH10	MAGI2-AS3	MYO10	CD55	TPM4	AC117503.1	ATP5PB	B2M	C1QB	RPS2	EFNB2	TFDP2	PRSS57	RPS27A
	FUCA1	FAM114A1	CENPW	GGCT	RBM8A	BEX3	GADD45B	PHLDA1	PTPRF	CCDC80	TUT7	JAK1	LTBP4	HOOK1	CCT8	EXT1	PDXK	RPL9	RASIP1	CHPF	STK17B	CYP19A1
	ACADVL	RND3	RAD51AP1	MYCBP	RPL17	AKR1B1	COLEC12	CAVIN2	CMYA5	CCN1	ACSS1	ACAN	CAV1	GSTP1	COX4I1	LMOD1	MSN	CEBPA	TSPAN18	KANK1	PYHIN1	RPL39
	SMDT1	EML4	MPC2	COMMD6	PMVK	NME1	LAIR1	EMILIN2	NKTR	SOCS3	KDM5B	ID3	MAGI2-AS3	TPT1	KHDRBS1	RRBP1	PSMB8	KYNU	ISG15	IQGAP1	SH3KBP1	EFNA1
	RPL7	NID1	TAF1D	PTMA	AURKAIP1	CENPX	KLF6	LIMD2	TMEM245	IGDCC4	DACT2	MFSD12	CRIP1	RASSF3	SRP9	FKBP7	CD37	PSMD7	STXBP6	ATP5F1B	ATP5F1E	SEC61G
	KANK1	PAMR1	DHTKD1	SMDT1	DANCR	NDUFA11	SCIN	CD63	MAP3K13	SCD	RYBP	FABP7	HAND2	NRK	EIF1AX	PARM1	BLOC1S1	RPL6	HDAC7	CENPF	CCDC107	NUCB2

## Sheet: Table_S3
Table S3: Top 200 marker genes of reclustered primary placenta
Cluster #	0	1	2	3	4	5	6	7	8	9	10	11	12	13
Annotated Cluster Name:	CTB0	CTB1	CTB2	CTB3	CTB4	CTB5	CTB6	pre_STB7	CTB8	EVT9	CTB10	pre_STB11	CTB12	EVT13
	MT-CO1	HMGB2	RPL34	MT-CO1	RPL21	MT-CO3	ARL6IP1	CGA	C1orf56	TPM1	LY6E	CGA	MT-CO3	TPM1
	MT-CO3	H2AFZ	RPL21	MT-CO3	PTMA	MT-CO2	HMGB1	MALAT1	SPP1	KRT19	NME2	KRT23	MT-CO2	KRT19
	MT-ND4	STMN1	RPS27	EFEMP1	RPL41	MT-CO1	HMGN2	GADD45G	LRRC75A	FSTL3	YBX1	S100P	MT-CO1	ACTB
	MT-CO2	MT-CO3	PAGE4	MT-CO2	TUBA1B	MT-ND4	PTTG1	INSL4	CTNNB1	CALD1	RPS2	ANXA1	MT-ND2	TMSB10
	MT-CYB	MT-CO1	RPS14	DUSP9	RPL17	MT-ND2	STMN1	TBX3	IFI6	COL4A1	RPS9	PHLDA2	MT-ND4	H19
	MT-ND3	MT-ND4	RPL13A	MT-ND2	HMGB1	MT-ATP6	MT-CO3	SLC40A1	RPL41	QSOX1	RPS3	GADD45G	MT-ND3	LAIR2
	MT-ATP6	HIST1H4C	RPL31	MT-CYB	RPS17	MT-CYB	MT-CO1	CSF3R	TMSB4X	IGFBP3	LDHA	PGF	MT-ATP6	KRT8
	MT-ND2	MT-CO2	RPS12	MT-ND4	RPL23A	MT-ND3	H2AFZ	CEBPB	MALAT1	FOS	RAN	INSL4	MT-CYB	FSTL3
	MT-ND1	MT-ND1	RPS27A	SPINT2	RPL31	MT-ND1	TUBA1B	LCMT1-AS2	AC092069.1	CD63	NPM1	EIF1	MT-ND1	TFPI
	MALAT1	MT-CYB	RPL41	SMAGP	RPS3A	MALAT1	MT-ND4	ANXA1	PHKG1	COL4A2	ENO1	CEBPB	MALAT1	RPL41
	SPINT2	MT-ND2	RPL27A	MT-ATP6	RPS6	MT-ND5	MT-CO2	SLC43A2	PEG10	KRT8	RPSA	HSPB1	APLP2	RPL37
	SPINT1	DEK	RPL17	SPINT1	RPS27A	PEG10	MT-CYB	SLC22A11	RPL37	C12orf75	RPL7A	SLC40A1	MT-ND5	S100A11
	APLP2	HMGB1	RPL26	SERPINF1	RPL35	FBN2	HMGB2	SQSTM1	AC006115.2	ASCL2	EEF1B2	CYP11A1	FBLN1	RPL18A
	IFI6	MT-ATP6	RPS25	APLP2	RPL13A	H19	NUCKS1	MT-CO1	CD14	COTL1	RPS5	DAB2	PSAP	IFITM3
	BCAM	TUBA1B	RPS15A	MT-ND1	RPL26	PEG3	MT-ND2	PRKCZ	RPLP1	FN1	RANBP1	SQSTM1	HSPA5	COTL1
	SERPINF1	TUBB	RPL23A	MGST3	RPS15A	CSF3R	MT-ATP6	KRT23	AL450306.1	MFAP5	HSP90AB1	FDX1	PDIA3	C12orf75
	MT-ND5	SMC4	RPS13	BSG	STMN1	WSB1	H2AFV	ST3GAL4	SET	GLRX	RPS17	HSPB8	BSG	RPS24
	BSG	PCLAF	RPL35A	MEST	RPS12	N4BP2L2	CALM2	NEAT1	F13A1	EFNA1	C1QBP	NUPR1	SON	JPT1
	GAS5	DUT	RPLP1	MT-ND3	RPS15	GNAS	PTMS	TOP1	AC106707.1	PPP1R14B	KRT19	LGALS16	FBN2	B2M
	FOLR1	MT-ND3	RPS3A	TINAGL1	TUBB	DDB1	MT-ND1	CLIP1	AC005921.2	TMSB10	RPL8	HSD17B1	SPINT1	PFN1
	RTN4	PCNA	RPS28	PEG10	RPL11	EGFR	HSP90AA1	PGF	HNRNPH1	DIO2	SERBP1	ARG2	HSP90B1	HPGD
	ITM2B	CDK1	RPS6	ANXA2	CALM2	RBM39	RAN	RRBP1	TYROBP	SLC16A3	RPL18A	TOP1	BCAM	RPL38
	TINAGL1	FUS	RPS19	RRBP1	RPL34	PNISR	HNRNPA2B1	MT-CO3	C1QA	B2M	TPI1	COX6C	APP	SRI
	OLR1	HELLS	RPS23	LDHB	RPL35A	JUND	MT2A	ARID5B	FOLR2	RPS27L	RPL7	PRKCZ	VWA1	LGALS1
	PERP	TYMS	RPLP0	SLC2A1	RPS8	SRSF5	CENPF	UBE2B	FCER1G	KLF6	SLC25A3	TAX1BP1	MT-ND6	MFAP5
	CTSC	CKS1B	RPL10	KRT18	HMGB2	APLP2	BIRC5	CYP19A1	RPS29	SOX4	RPS3A	ST3GAL4	WSB1	IGFBP3
	MEST	CALM2	RPS17	IFI6	RPS13	NEAT1	MT-ND3	ATP6V0C	SYNC	LAIR2	BTF3	UBE2B	RRBP1	RPS18
	S100A10	PRC1	RPL10A	COMT	RPS14	BCAM	CDKN3	COBLL1	AIF1	LAPTM4A	RPL5	H3F3B	EFEMP1	GLRX
	EFEMP1	MT-ND5	RPL7	FBLN1	RPS19	CDKN1C	HSP90B1	S100P	C15orf48	H19	HNRNPA1	PDLIM2	P4HB	QSOX1
	PSAP	MKI67	RPL12	LRPAP1	RPL18A	TCAF1	HSP90AB1	CDKN1C	RNASE1	TFPI	RPS7	S100A9	SYNE2	RPS27L
	CST3	TOP2A	RPL32	TMED9	RPS2	TENM3	PTMA	TAX1BP1	CCL3	FXYD5	GAPDH	MUC15	N4BP2L2	RPL11
	CTSL	NUSAP1	RPL11	RPN2	RPS25	TGM2	LSM4	SLC13A4	B4GALT1	MORF4L2	RPL3	RPS27	GRN	HLA-G
	LEPROT	ZWINT	RPL18A	PSAP	RPS23	LAMA5	GGH	SLC2A1	LY96	MALAT1	SNRPB	RPL34	CTSL	MT1X
	N4BP2L2	RRM2	RPS20	SLC22A11	H2AFZ	APP	CDC20	ERVW-1	CD36	TGFB1	PPP1R14B	BTG3	PEG3	RPL39
	TMEM59	GMNN	RPS18	FXYD3	RPS27	MSI2	JPT1	MT-CO2	RASGEF1B	SH3BP5	SET	MAP1LC3B	CTSC	KRT7
	CIRBP	RANBP1	RPL13	VWA1	RPLP0	DSP	SNHG3	EIF4G2	PAQR7	GATA3	CCNE1	ATP6V0C	NFE2L3	PLAC8
	B2M	TK1	RPS15	BEX3	RPL27A	CRIM1	HMGN1	SECISBP2L	RPL31	C1QTNF6	RPL4	RAB11A	CSF3R	LAPTM4A
	EIF4A2	UBE2C	RPS8	ARL6IP5	RPS3	KCNQ1OT1	CCNB2	CYP11A1	C1QB	PGF	GCSH	ARID5B	SLC2A1	GAPDH
	PNRC1	MALAT1	RPL30	PDIA3	HMGN2	SLC43A2	COX8A	WSB1	C1QC	ITGB1	RPL28	RPL21	TINAGL1	ISG15
	APP	ORC6	S100A11	ATP5F1A	RPL36A	SLC26A2	ANP32B	MT-ATP6	MEF2C	TAGLN2	RPL29	GDF15	CD46	MT1E
	JUN	UBE2T	RPS2	NDUFB9	RPL8	FUS	B2M	HSPB8	RPS24	IFITM3	HMGA1	GABARAPL1	CALR	FN1
	GRN	HMGN2	RPS24	NFE2L3	RPLP1	CDH1	HNRNPR	SLC52A1	APOE	TLE5	TIMM13	HMGB3	SLC22A11	EBI3
	RPL10	H2AFX	RPS16	ARPC2	RPL15	DNMT1	HSPD1	MUC15	FTL	EBI3	TUBB	TMEM40	SPINT2	ASCL2
	SMAGP	WDR34	RPS4X	MORC4	RPL28	CD46	DYNLL1	SLC1A2	VSIG4	ITGA5	LSM4	NFYB	LRPAP1	LY6E
	SLC22A11	NASP	RPL15	HSPA8	RPS24	ITIH5	HSPE1	DAB2	RPS27	ARID3A	UQCRH	RAP1B	CLDN4	ARHGDIB
	RPL10A	SRSF2	RPL35	SLC39A1	RPL7	DDX17	TOP2A	NUCB2	LYVE1	PTPRF	PA2G4	FAU	RPN2	CD63
	LRPAP1	HNRNPD	RPL19	VSIR	RPL13	SEMA6A	APLP2	PDLIM2	RPL11	JPT1	EEF1D	ERVW-1	FUS	FTH1
	PEBP1	AURKB	RPL3	PARP1	RPS5	ADAMTSL4	LSM5	GDF15	HPGDS	PLAC8	ACTG1	SERP1	KTN1	TAGLN2
	RPL7	DHFR	RPL36A	SLC27A2	RPS20	SIGLEC6	LDHA	MT-ND4	FCGRT	ARHGDIB	H2AFZ	LGALS13	AKAP9	RPL27
	TFDP2	CDCA4	RPS29	CTSC	RPL32	BRD4	SFPQ	ABHD5	MAF	TCF7L2	PKM	PAPOLA	TMED9	YBX1
	CLDN4	CENPU	RPL14	MPP1	RPS18	FTX	PTGES3	NFE2L3	GPNMB	FLNB	EEF1G	CDKN1C	DSP	APOC1
	SRSF5	NAP1L1	RPL24	QPRT	RPL14	POLR2J3	PEG10	CD63	CDC42SE1	LIMA1	RPL17	GSTA3	NEAT1	HTRA4
	ERP29	NUCKS1	RPL36	BCAM	RPS7	RRBP1	HNRNPA3	MAN1A2	SCN9A	ISG15	HSPA8	ATP6V1G1	ITIH5	RPL10
	BEX3	TMPO	RPS7	TMEM59	TMSB10	SMARCA2	ANP32E	ARID3A	VIM	ADAM12	RPL19	ERVFRD-1	LAMC1	RPL35A
	ANXA2	CKS2	RPL8	TGM2	RPS16	ARGLU1	CMTM6	KCNN4	EIF5A	MYADM	ANP32B	NUCB2	PDIA6	FXYD5
	EXTL2	KPNB1	RPL22	VAMP8	RPSA	GTF2I	CCNB1	ZNF292	CD163	SRI	SLC25A6	RPL23A	MT-ND4L	HAPLN3
	WSB1	DNAJC9	RPL39	MALAT1	RPS28	ADGRG1	DEK	MT-CYB	PLTP	CALU	SNRPE	SIAH1	SLC43A2	CCNE1
	RPS4X	RRM1	RPL27	CLTA	RPL6	LAMC1	HNRNPD	RHOBTB1	MAFB	FLT1	RPL15	TBX3	FBN1	IFI27
	RPL3	BIRC5	RPL37A	ITM2B	RPL36	CCNL1	MRFAP1	GABARAPL1	S100A9	CEBPB	PGAM1	KMO	ITM2B	DIO2
	FAM3B	HNRNPAB	RPLP2	PAGE4	RPL10	DLG5	SET	EZR	RPL32	LRRFIP1	CCT6A	CYP19A1	EXTL2	SPP1
	RPL13A	YWHAH	COX7C	SERINC2	PFN1	KANK1	BSG	TFRC	RPS3	P4HB	TUBA1B	ATP6V1F	MESD	PGF
	RPS2	SMC3	RPS3	ERGIC3	PAGE4	EML4	PSMA4	RBMS1	EEF1A1	NRIP1	SRM	MAP1LC3A	SERPINF1	MYCNUT
	TSC22D1	SRSF7	FTH1	ATP5F1B	RPL27	MBNL3	CKS1B	TMEM40	HCST	TYMP	PDIA6	SERF2	ERP29	CAPG
	SNHG29	SIVA1	RPL37	LGALS3	RPL7A	MIR205HG	ERH	MT-ND3	CTSS	HLA-G	CYC1	ZFAND6	ITGB1	MT1F
	FOS	H2AFV	RPS5	GSTP1	CKS1B	FOXO4	YBX1	PAPOLA	PAGE4	ACTB	NME1	LCMT1-AS2	PNISR	RPL26
	FBLN1	CENPF	RPL18	AP2M1	RPL3	FBN1	CALM1	BTG3	CCL4	BRI3	RPS6	SERPINB2	SRSF5	RPS17
	EGFR	TUBB4B	RPL6	ARPC1B	RPL19	CRYBG1	CACYBP	SIAH1	CCL3L1	EFHD2	MT-CO3	PAIP2	KCNQ1OT1	NOTUM
	BTF3	CARHSP1	ATP5MG	FUCA1	RPL5	MT-ND6	HMMR	TCAF1	GPR34	MT1X	RBM3	FAR2	TMEM59	RPL32
	GSTK1	UBE2S	RPL5	P4HB	RPL10A	OLR1	CD24	SLC16A3	ATP1B1	AC211433.1	VDAC1	EIF4G2	SLC26A2	SLC16A3
	EIF3E	CLSPN	UBA52	OLR1	FTH1	DAG1	PERP	HEXIM1	IAH1	VASP	NCL	TINCR	PRKCSH	RPS6
	TOMM7	SYNE2	SERF2	TUFM	RPL12	PSAP	RPA3	GSE1	PMP22	NOTUM	ATP5MC3	MOB4	LRP2	MMP2
	CD59	SMC2	GSTP1	SLC43A2	GSTP1	SF1	PSMB6	FAM184A	RASSF4	IL1RAP	P4HB	RPL41	DDX5	MIF
	CSF3R	BSG	RPL9	APP	RPL22	FOSB	HNRNPK	SLC26A2	ZEB2	TMED10	RPL11	RPL39	LGALS3BP	CSH1
	PEG3	ATAD5	UQCRB	MLLT1	SNRPD2	SYNE2	CENPW	NECTIN4	MARCKS	NEAT1	PABPC1	RAB9A	SLC27A2	RPS13
	WASF2	ASPM	PHLDA2	PISD	SNRPD1	AHNAK	LBR	KIAA0040	AC091607.2	NPC2	PPA1	EZR	MYH10	SDCBP
	PFDN5	GGCT	RPL7A	MT-ND5	RANBP1	AKAP9	MT-ND5	BRAF	CD68	XBP1	TOMM6	CMAS	DPP4	TUBB6
	RPL18	LMNB1	RPL28	JUN	RAN	SON	HNRNPA1	LYPD3	MS4A6A	KRT7	MDH2	MTHFS	RBM39	RPL8
	RPS14	HP1BP3	LDHB	CLN3	SNRPG	ITGB4	YWHAH	AAK1	RGCC	PRSS8	MT-CO2	PDCD4	FTX	RPS3A
	MIR205HG	SMC1A	NACA	LMNA	RPL30	MYH10	CLIC1	GREM2	PTMA	HSPA2	EEF2	S100A11	ALDH7A1	RPL13
	ARL6IP5	RAD21	RPSA	BCAP31	GAPDH	YAP1	HMGN3	FDX1	AC064836.4	APOC1	RPL35A	PHOSPHO1	EGFR	RPL9
	SLC25A6	SRSF10	XAGE3	CD59	CDK1	NKTR	ATP5IF1	AKAP9	IGSF6	GLIPR1	IMPDH2	ARL4A	CRIM1	COL4A1
	NAP1L1	CENPX	RPS11	DDX5	RPL24	UTRN	OAZ1	ESRRG	SPI1	RFK	PFN1	RNASEK	LAMA5	MORF4L2
	EML4	DIAPH3	S100A6	PERP	UBA52	SLC22A11	MZT2B	EPAS1	FCGR1A	CLTB	TOMM40	OVOL1	SLC3A2	AIF1L
	MAGED2	ASF1B	RPL23	ISYNA1	RPL9	FRMD4A	ACTG1	MT-ND1	AMFR	LGALS1	PRDX4	ABHD5	POLR2J3	RPS11
	TIMP3	PSIP1	TMSB10	ALDH7A1	RPS29	CLTC	TROAP	ARG2	LPAR6	LY6K	RSL1D1	KIAA0040	CD151	GLIPR1
	VWA1	CCNA2	RPL38	PRDX1	PCNA	JUN	SLIRP	CD55	MPRIP-AS1	BZW2	CHCHD2	ZNF703	SLC39A10	LRRC75A
	ATP6V0E1	HNRNPDL	SNHG29	PSMB6	RPS4X	NHLRC3	NDUFA4	NUFIP2	CD74	ENG	SRSF3	MIR22HG	JUN	TGFB1
	PEG10	CDT1	SMAGP	CALR	ACTB	FSTL1	EIF1AX	HSD17B1	ALOX5AP	CD9	CYCS	MAOA	LAMB1	TSPO
	CUTA	MAD2L1	RACK1	KRT7	UBE2C	CTNND1	CALM3	ERVFRD-1	TLR4	SPARC	CNBP	PSMC4	SERPINH1	DSTN
	SELENOP	HNRNPU	FAU	ATP2B1	POLR2L	TLE4	SPINT2	RBM47	PLEK	ADAMTS1	NDUFA4	SKP1	GPAA1	HSPA2
	EID1	APLP2	ATP5MC2	DEGS1	RPL37A	UBE2H	HNRNPH3	MT-ND2	CYBB	VGLL3	RPS27A	UBE2A	F5	BZW2
	NENF	HNRNPA2B1	SNRPD2	PRDX5	RPL29	ACSS1	SNRPG	ARHGAP24	HLA-A	UPP1	RPL6	BZW2	DEGS1	GPX4
	ATP5MC2	MCM7	UQCR10	BRD4	NUSAP1	MT-ND4L	PSMA2	PRRC2C	A2M	MT1F	HSPD1	RPS12	ATP2B1	RPS19
	RACK1	ATAD2	EEF1G	SLC25A5	RPLP2	PBX1	HNRNPM	SEMA6A	CCL2	AP3S1	RPS13	BCAR4	CANX	RPL36
	C4orf3	ANP32B	RPL29	IL10RB	CKS2	TFRC	TUBB4B	TCF25	LAPTM5	TSPO	RPL26	SGK1	APMAP	LITAF
	RPL12	CENPM	ATP5F1E	HSP90B1	MT2A	ARID3A	MEST	MAFF	TUBA1A	PKP2	SNRPD1	CLIC3	MET	RPS29
	RPS5	CHAF1A	VAMP8	ERP29	YBX1	MYOF	UBE2S	BACE2	S100A1	HLA-C	AHCY	MAFF	CDH1	PPP1R14B
	QPRT	BRCA2	RPS26	ECHS1	DBI	AGL	SNRPF	SERP1	ITGB2	HPGD	TUFM	NRBF2	FOSB	MYL12A
	MGST3	CCDC34	SKP1	PNP	LSM3	MMP14	SNRPB	MAP1LC3B	HBG2	FHL2	RPL10A	EIF4A1	SF1	TUBA1C
	FBN2	RPA3	VGLL1	DDOST	PTTG1	MPHOSPH8	SNRPD1	MIR22HG	LRP2	SSR4	SRSF9	EDF1	PDIA4	MT1G
	FTL	TPX2	UBB	ACSS1	PCLAF	TAF1D	PDIA6	MAP1LC3A	CYTH4	CMTM3	TOMM5	HIGD1A	GOLGA4	ADAM12
	TMED4	BCAM	PRDX5	EGFR	BIRC5	LGR5	SSNA1	HDAC5	DLK1	ITM2B	SLC25A5	CGB3	DDX17	LDHA
	BTG1	USP1	RPS9	TMEM150A	SNRPE	DOCK8	PPIA	H3F3B	GYPC	HAPLN3	FBL	OAZ1	LAMP1	TLE5
	DNMT1	EZH2	NDUFA4	CMTM6	HINT1	COLEC12	TRMT112	SLC19A2	MS4A4A	FSTL1	MT-CO1	RAB1A	HOOK2	SELENOM
	FXYD3	PAXX	NDUFB2	YWHAB	RPL37	FOS	LSM6	PIK3C2A	MNDA	CDKN1C	MT-ND4	RPL24	ITGA6	GCM1
	TECR	BRCA1	PFDN5	EIF3G	TUBB4B	RSRP1	HNRNPDL	APMAP	SCN1A-AS1	SSR3	EIF4A1	HEXIM1	HNRNPU	SH3BGRL3
	TMED9	CENPW	CLTA	GRN	NDUFA4	TRIM33	TMBIM6	SLC3A2	PLA2G7	CITED2	C19orf48	RPS27A	OS9	RPL29
	ECHDC2	KIF23	RPS10	OAZ1	RPS9	FOXP1	CCNA2	BZW2	RPS21	YWHAZ	AKR1B1	DNAJB9	TMBIM6	SSR3
	IDH1	SLBP	BEX3	FBN2	TYMS	NIBAN2	KPNA2	B3GNT5	AREG	HTRA4	PHB	NDUFA6	CCDC47	EEF1A1
	PNISR	CDCA5	S100A10	MAGED1	PPIA	ARID1B	RAD21	DDX5	MRC1	CAPG	HNRNPD	GABARAP	ITGAV	CGA
	NDUFA13	BUB3	RPL36AL	CSF2RA	RPA3	LRP1	NDUFC2	ZNF703	AC022137.4	ANXA4	RPS15	XAGE3	SLC39A1	C1orf56
	NDUFA4	RAD51AP1	PRDX1	HEXB	LSM4	TBL1X	EFEMP1	TACC2	SIGLEC1	MYCNUT	RPL9	BPGM	ACADVL	ITM2B
	GPX3	CKAP2	EEF1A1	CD24	RPS26	AAK1	HINT1	NECTIN3	HLA-DRA	JAK1	RCN1	RPS25	TUFM	RPS9
	ECH1	GTSE1	XAGE2	ITIH5	RPL23	NRP2	SEC11A	PHLDA2	IGF1	PSAP	RACK1	RPS13	HEXB	CALD1
	KTN1	PEG3	GAPDH	LARGE2	NME2	SRRM2	MRPL51	IDS	GMFG	CCNE1	NHP2	RPS28	TENM3	ACTG1
	SNX3	PGP	ATP5MF	SLC25A3	CENPW	LAMB1	NAA38	EIF1	SLC9A9	SDCBP	APRT	RPLP2	ISM2	MT1H
	SIGLEC6	CENPN	ATP5ME	MPC2	TUBA1C	RERE	NUSAP1	KMT2C	CENPF	PLK2	KHDRBS1	RPS14	HACD3	S100A4
	DDOST	WEE1	NDUFA11	MESD	RPL39	DYNLL2	POLR2L	FAM13A	B2M	TUBB6	MZT2B	RPL26	MMP14	SEC61G
	SLC2A1	NCAPG	ATP5PO	GSTK1	YWHAH	KDM5B	KHDRBS1	EPS8L1	PLA2G2A	MXRA8	CACYBP	KYNU	DLG5	CLTB
	RPL26	JUN	AC092718.6	ATP5MG	GGCT	TIMP3	MDH1	CEBPA	SRGN	AFAP1	RPL10	CCNDBP1	NKTR	EFNA1
	BCAP31	LSM4	ECH1	TECR	UQCR10	DLG1	TUBA1C	ATP6V1G1	CD53	TIMP1	CCT3	GREM2	KCNN4	TYMP
	GTF2I	CKAP2L	COX6C	SLC26A2	UBB	CEMIP2	SERBP1	EPHB4	ACTB	PLCL2	CALM1	PIM3	SPPL2A	SERPINE2
	RPL7A	MZT2B	DBI	CDKN1C	PRDX2	ITGB5	TMBIM4	TOX4	OTOA	PTN	SRSF2	MYO10	SIGLEC6	RPL23A
	PHACTR2	LMNB2	UBL5	RAB31	UBE2T	ITGA6	POMP	SPAG9	TREM2	LHFPL6	PPIA	TBPL1	TLE4	CA2
	OSTC	FEN1	ATP5PF	SLC6A4	CCNA2	CTSC	TXN	ATP10D	AL121944.1	MT1E	SEC11A	ADHFE1	LRP1	RPLP0
	RTN2	PTMA	COMMD6	LAMP1	SNHG29	SLC40A1	PSMB1	DHX36	ZNRF3-AS1	ABCA7	HNRNPF	OTUB2	ADAMTSL4	SOX4
	BRD4	HMMR	ATP5PD	COX6A1	TK1	MYORG	HNRNPU	ATG9B	LCP2	FOSL2	EIF5A	HMOX1	IQGAP1	C4orf48
	BBX	ANLN	POLR2L	CST3	SLIRP	PTPN14	TSPAN13	OVOL1	AL136979.1	F11R	UQCRFS1	YPEL5	LMAN2	PTN
	ATP6AP2	DHTKD1	EIF3E	RTN4	RPL18	LRP5	HADHA	RASA1	ALDH1A1	ISM2	CHCHD10	FAM104A	DYNC1H1	RPL35
	HMGN3	ILF3	CSTA	PDIA6	CDC20	SSBP3	LY6E	HSPA5	LST1	RALBP1	PHB2	HOPX	ATRX	NPC2
	RPL15	CDCA3	COMT	TMBIM4	PA2G4	MAGED1	SNRPE	PDCD4	MARCH1	BCAR4	PTMA	RPLP1	NHLRC3	ABCA7
	RPS12	ARGLU1	TMA7	B2M	MAD2L1	NUFIP2	CCT5	SLC38A9	MS4A7	EPAS1	PTGES3	RPL13A	COLEC12	CMTM3
	MRFAP1	VKORC1	TRAPPC1	PEG3	ENO1	XIST	DBI	SERPINB2	AL031714.1	AIF1L	HNRNPR	COQ10B	ATP6AP2	RPL37A
	CD46	SRRM2	COX4I1	CTSL	H3F3A	CCDC18-AS1	GSTO1	CPEB4	RNASE6	DOCK5	TOMM7	AKR1B1	ADGRG1	BST2
	PTTG1IP	LIG1	ELOB	ATP1B3	GSTO1	NF1	TUBB	CDYL	FANCD2	ADM	CCT2	BTG1	NRP2	ANXA4
	AC110619.1	HNRNPR	UQCRQ	TMBIM6	LSM5	LINC01949	TYMS	GATA3	CD84	PLOD1	KDELR2	TPT1	SF3B1	CITED2
	MPHOSPH8	PBK	ROMO1	PSMB5	PTGES3	IGF2	LMNB1	RAB9A	NCL	MFAP2	GDI2	DHRS9	GTF2I	PRG2
	TMBIM4	MCM10	MYL12B	TPST2	RACK1	BSG	PSMA7	NUPR1	NCKAP1L	CD276	PEBP1	ATP6V1E1	ARGLU1	RPS15A
	MESD	H1FX	SOD1	COX7A2	CCNB1	LUC7L3	SYNCRIP	AP2A1	STAB1	HTRA1	TPM1	VGLL1	PPIB	TIMP1
	ASAH1	MCM3	SLIRP	FAM89A	DUT	LGR4	TK1	LINC01949	LUM	SAT1	TKT	HBP1	LMAN1	BCAR4
	TUSC3	KIF20B	ATP5MPL	MRFAP1	ATP5ME	TFDP2	S100A10	SLC19A1	CCL4L2	FNDC3B	CCT5	DCTN6	CPVL	LY6K
	EPB41L4A-AS1	FBN2	WDR83OS	CLDN4	CENPN	ARHGAP23	SRSF2	TINCR	RENBP	RABAC1	CCT4	RPL17	PNN	RPL30
	DSP	CCDC14	GAS5	FAM3B	SNRPF	KTN1	H3F3B	SIN3B	AC244213.1	RHOBTB3	CYBA	CEBPA	UTRN	PLIN2
	RPS8	TMEM97	CYSTM1	SMS	ATP5MF	METTL7A	NASP	CRYBG1	RPL18A	FOSB	ATP5F1B	EPS8L1	SEC62	RPS27
	SNHG8	TFDP1	COX7B	HSPD1	TMA7	NCOA3	CNIH4	RYBP	AC092171.3	SH3BGRL3	FTH1	ARF4	AGL	FABP5
	RPS3	SGO1	GTF2H5	TUSC3	CCNB2	NFE2L3	PYURF	HSPB1	EGFL7	SDC4	MT-ND1	RBM42	DLG1	KRT18
	UTRN	CENPK	FKBP3	IDH2	EEF1G	ADAMTS6	PEG3	MYO10	HLA-B	PLIN2	SRP9	UBA52	N4BP2	MYL6
	TCAF1	PRKDC	UQCRH	BBX	UQCRQ	NFAT5	CCT6A	NRBF2	CD37	TIMP2	NUTF2	LYPD3	GJA1	TNFSF10
	ITIH5	RFC3	ATP5IF1	UBB	RPL38	TMEM150C	RTN4	SGK1	PTPRC	LGALS3BP	RHOA	SH3BP5	COX6A1	AC092069.1
	RBM39	PKMYT1	PSME1	PLPP3	HSPE1	CUX1	LMNA	RAI14	C2	MYH9	MRPL12	RPL31	GPC1	PPIB
	CCNI	SPC25	TOMM7	SLC22A18	COX8A	FAM120A	LMNB2	HERPUD1	SPC24	PPIB	SUMO2	SECISBP2L	FUCA1	CD9
	TMBIM6	MYBL2	ANXA5	ATP5MC3	SPC25	PLPP3	CHCHD2	RAB11A	LILRB5	LITAF	ATP5PB	TOX4	GAA	C1QTNF6
	EGR1	GINS2	NDUFA1	EID1	LDHA	F5	TCP1	BTG1	LINC01094	PDIA6	MT-CYB	RPL10	IGDCC3	EFHD2
	CYSTM1	DEPDC1	CLIC3	CCNI	PBK	PNN	NCL	NFKBIA	MORC2-AS1	SLCO4A1	TOMM20	SEM1	ASPH	RPL17
	REEP5	SET	NDUFB4	VGLL1	AURKB	RASA1	SRP9	CCNDBP1	FGD2	GRB2	EIF3K	RAB2A	ASH1L	JAK1
	ECI2	MND1	MIF	NDUFA13	TXN	ZFP36L1	ATP5MC3	SLC49A4	RPS12	HSP90B1	STOML2	NAGK	FOS	UPP1
	RPS27A	DTYMK	MYL6	MYL12A	CDKN3	PDE4DIP	GTF2A2	SERINC5	RPL14	ATF3	RPL14	KISS1	HEXA	RPS27A
	CLIC3	C21orf58	COX14	CCND3	ZWINT	MFSD4B	SEPTIN7	ARL4A	LRRC39	GALNT1	HNRNPAB	BACE2	ITGB5	SFRP1
	CAVIN1	HIST1H1D	OST4	PSMB1	ERH	DSC3	COX6A1	MT-ND5	CD52	COL27A1	RPS18	FXYD3	IFI6	SNHG5
	VAMP8	KIFC1	TIMM8B	SELENOP	NME1	ASH1L	ILF2	PIM3	NNMT	KRTCAP2	CALM3	AKIRIN2	CTSV	TNNI2
	HSP90B1	MIS18BP1	SLC25A6	C1orf122	MIF	GRAMD2A	PRELID1	CSNK1A1	CXCL14	JUND	SNHG16	UBE2D1	GLG1	MXRA8
	PDIA3	SF1	ARPC3	CNPY2	AURKA	QKI	AHSA1	MAFK	CD28	CCN1	HSP90B1	NACA	CEMIP2	RFK
	COMMD6	HNRNPA3	NDUFS5	ACADVL	RAD51AP1	ANKH	CNBP	BASP1	LYZ	KDELR2	EIF1AX	RPS20	SLC19A1	ITGA5
	COMT	RAD51	UQCR11	SPCS1	EEF1B2	MME	CCT4	DHRS9	AC025175.2	RGS16	KLF6	RPS11	MEST	EPSTI1
	TSPAN13	MT2A	ATP5MD	GABARAPL2	ATP5IF1	NR2F2	CSRP2	LGALS16	CD5L	PTGES	NDUFAB1	RPL30	GPBP1	TFPI2
	RPS28	NUF2	ATP5MC3	SRSF9	SNRPC	ORMDL1	PFN1	GOLGA4	C3AR1	PDLIM5	RPS8	HES1	BCAP31	HLA-C
	SARAF	C19orf48	ECHS1	FDFT1	RPS10	GLG1	SSB	APLP2	EGFL6	SLC2A3	RPL13A	ALAS1	DSC2	GLO1
	CMTM6	BARD1	PSMA4	ATRAID	ATP5MC1	MET	MICOS10	FAR2	SH3BGRL	SELENOM	MZT2A	RBM8A	DSC3	PLK2
	CLDN3	PNN	SNX3	TFG	CENPM	CDK6	KTN1	TUT7	IGSF10	CEBPD	ATP5F1A	KRT8	TRA2A	RPLP1
	TMEM141	IGDCC3	GSTA3	TMEM179B	CENPK	NUDT4	PSME2	HLA-E	HAVCR2	HLA-E	DCTPP1	CHMP4B	GOLGB1	TUBB
	NOP53	HACD3	ECI2	HSP90AA1	PSMA4	TUT4	EID1	DNAJB9	AP1S2	CALR	MRPL11	ARHGAP18	LARGE2	SSR4
	SLC40A1	FANCI	ADIRF	MYH10	ATP5F1E	CLIP1	TAF7	RAP1B	GIMAP4	GJA5	NOP56	PLIN2	CCNL1	TIMP2
	TGM2	KPNA2	RNF181	GNAS	NDUFB2	LRP2	CYCS	KDM5B	PTGDS	TPM4	TCP1	RNF11	KANK1	FABP7
	NDUFB9	NSD2	SUCLG1	EXTL2	ATP5MG	TINAGL1	BCL2L12	GSTA3	MTA2	MBD2	FKBP1A	DNAJB4	TM9SF2	MFAP2
	ZFAS1	HSP90B1	PFN1	TSC22D1	ATP5MC3	RBM25	PSMB2	TPM4	SLCO2B1	SLC39A8	EIF4B	ATP6V1D	LSR	AP3S1
	SLC43A2	SUPT16H	NDUFS6	SYPL1	NDUFS5	USP25	ATP5F1A	MLLT1	CELF2	TMED2	HMGN1	NEURL1	RCN2	AC211433.1
	RPS18	SNRPD1	ESD	IGDCC3	PSMA7	HOOK2	BANF1	UTRN	LAIR1	GPR146	CCT8	IGSF5	ARID1B	ANXA2
	CDO1	SMCHD1	LGALS3	HSPA5	CENPU	DOCK9	RBM3	NFYB	HGF	TNFAIP3	APEX1	CLTA	SLC12A9	CCNB1
	P4HB	KNL1	KRT7	PSMD7	KPNA2	IL6ST	SLC27A2	SIAH2	AL133453.1	GATA2	RPS23	ISG20	SFPQ	RGS16
	NR2F2	CALM1	NDUFA2	MAGED2	LMNB1	TMEM245	DTYMK	OTUB2	BMP2K	FBLIM1	SSRP1	SUB1	RNF43	FLT1
	ATRAID	SUZ12	EIF3G	NDUFB5	S100A11	SEC31A	YWHAZ	PLAC4	TMIGD3	SYT8	COX5A	OSER1	WLS	PHKG1
	LAMTOR5	RAD51C	PRDX2	APMAP	CALM1	DPP4	PCMT1	GRN	AC093690.1	MMP14	ARPC2	MAP3K8	HSP90AA1	VASP
	TPST2	AC091057.6	NDUFB1	GSTA4	RRM2	GOLGB1	CENPN	VAV3	MSR1	MBNL2	YWHAQ	PMAIP1	SIL1	LIMA1
	NPM1	CDC6	PIN4	CTNNAL1	CHCHD2	SYT7	TOMM6	KMO	FABP5	IL1R1	SLC25A39	SDC1	UBXN4	RALBP1
	EEF2	RNPS1	TPT1	SAT1	SRP9	ANO6	TPR	ATXN7	OTULINL	LMAN1	PCLAF	HNRNPH2	CD47	RPLP2
	SPCS1	PPIA	PEBP1	SLC35B4	TPI1	SEC62	GABPB1-AS1	CPM	TMEM273	SERPINE2	PPIB	PHYHIPL	NF1	TNFAIP2
	RPL30	ZDHHC12	PSMB6	ANXA5	LDHB	ZFHX3	LSM7	BCORL1	CD4	CLDN19	KPNB1	ATP6V0D1	FOLR1	FOS
	ZFP36L1	TSEN34	NDUFC1	PSMB7	ANAPC11	TCEAL9	RHEB	PEG3	ABCB1	HSD3B1	ARPC1B	GPR87	TECR	SDC4
	PPIB	FBXO5	RBIS	KCNN4	CACYBP	TFCP2L1	PRDX3	RNASEK	HBA2	C4orf48	MRPS34	NFKBIA	ADAMTS6	TXN
	EIF3H	TACC3	ATP5F1C	COX4I1	DTYMK	SRSF11	ARF1	ARHGAP18	LILRB3	KDELR1	EIF3M	PSMA1	SRSF11	SH3BP5
	PLD3	NOP56	COX7A2	PPIB	RPL36AL	PALM2-AKAP2	TMED9	APP	NCF4	SEMA4C	VDAC2	CKB	MIR205HG	CSTB
	FOSB	KIF22	NPM1	CAMK2G	FAU	USP22	SMC4	MIDN	IFI16	CAP1	RPL27	TRAPPC2B	SGCE	C8orf31
	CD47	LSM8	PRDX6	ATP5F1C	MRPL51	AFF4	CFL1	ERC1	RPS18	ACTN1	GNL3	KRT18	MACF1	RPS7
	RPS21	RACGAP1	AC110619.1	SNX17	BUB3	DMD	PSMA5	CMAS	FCGR1B	TMEM50A	MRPS12	COX7B	CHPF	NME2
	VSIR	RFC4	NDUFB3	DNMT1	UQCRH	TRA2B	MESD	PAIP2	SPRED1	OPN3	RPL22L1	SEC61G	PRRC2C	TPM4
	LMO4	PCBP1	EDF1	KRT8	GCHFR	HNRNPU	OSTC	ZFAND6	FAM20A	P4HA1	DANCR	DPEP2NB	RSRP1	ID3
	PDLIM1	SRSF4	LAMTOR4	SIAH2	COX7C	ZNF518A	RCN2	GNAS	RPL23A	EIF4EBP1	MLEC	SLC13A4	POR	CLIC3
	SELENOF	WDR76	TRAPPC6A	COLEC12	HNRNPA1	RICTOR	YWHAE	ERVV-1	PCED1B-AS1	PDIA4	TPM3	DEDD2	DAG1	ADA
	RPL27A	GGH	SMDT1	TIMP3	SIVA1	CROT	SEC62	IGSF5	IFI27L2	NLRP2	PARK7	AATF	RBM5	CHCHD10
	CSF2RA	CKLF	SRP14	SLC52A2	H2AFX	CDCA7	YWHAQ	SEMA7A	MILR1	PXN	MRPS24	GSKIP	NRP1	MMP12

## Sheet: Table_S4
Table S4: Cell numbers of each cluster by gestational age for UMAP shown in Figure S2D
	CTB0	CTB1	CTB2	CTB3	CTB4	CTB5	CTB6	pre_STB7	CTB8	EVT9	CTB10	pre_STB11	CTB12	EVT13	Total	Size Factor
6wk	2757	2795	2642	1636	2305	1663	1594	1169	867	573	1032	667	396	144	20240	1.42105
13wk	960	843	752	1386	489	844	574	438	736	808	255	104	178	155	8522	3.37503
Total	3717	3638	3394	3022	2794	2507	2168	1607	1603	1381	1287	771	574	299	28762
Size Factor Normalized cell counts
	CTB0	CTB1	CTB2	CTB3	CTB4	CTB5	CTB6	pre_STB7	CTB8	EVT9	CTB10	pre_STB11	CTB12	EVT13
6wk	3917.83	3971.83	3754.41	2324.83	3275.51	2363.2	2265.15	1661.2	1232.05	814.26	1466.52	947.839	562.735	204.631
13wk	3240.03	2845.15	2538.02	4677.79	1650.39	2848.52	1937.27	1478.26	2484.02	2727.02	860.632	351.003	600.755	523.13
Percentage of total cells by GA
	CTB0	CTB1	CTB2	CTB3	CTB4	CTB5	CTB6	pre_STB7	CTB8	EVT9	CTB10	pre_STB11	CTB12	EVT13	Total
6wk	0.136215	0.138093	0.130534	0.08083	0.113883	0.082164	0.0787549	0.0577569	0.042836	0.0283103	0.0509881	0.0329545	0.0195652	0.00711462	1
13wk	0.11265	0.0989204	0.0882422	0.162638	0.0573809	0.0990378	0.0673551	0.0513964	0.0863647	0.0948134	0.0299226	0.0122037	0.0208871	0.0181882	1
	CTB0	CTB1	CTB2	CTB3	CTB4	CTB5	CTB6	pre_STB7	CTB8	EVT9	CTB10	pre_STB11	CTB12	EVT13
Log2 Fold Change 6wk/13wk	1.0235	1.04195	1.04995	0.917263	1.09252	0.976519	1.02066	1.01599	0.910305	0.847214	1.07887	1.1695	0.989782	0.850056
Log2 Fold Change 13wk/6wk	0.97704	0.959743	0.952429	1.0902	0.915315	1.02405	0.97976	0.984266	1.09853	1.18034	0.926895	0.855068	1.01032	1.17639

## Sheet: Table_S5
Table S5: Top 200 marker genes of reclustered primary placenta
Annotated Cluster Name:	CTB1	CTB2	CTB3	pre_STB7	EVT9	pre_STB11	EVT13
	H2AFZ	RPL41	MT-CO3	CGA	TPM1	CGA	TPM1
	STMN1	RPL21	MT-CO1	MALAT1	KRT19	KRT23	KRT19
	HMGB2	RPL31	MT-ND3	GADD45G	FSTL3	S100P	ACTB
	TUBA1B	RPS27	MT-ND2	INSL4	CALD1	ANXA1	TMSB10
	HMGB1	RPS12	MT-ATP6	TBX3	COL4A1	PHLDA2	H19
	MT-CO3	RPL23A	MT-CYB	SLC40A1	QSOX1	GADD45G	LAIR2
	MT-ND4	RPS27A	MT-CO2	CSF3R	IGFBP3	PGF	KRT8
	DEK	RPL17	MT-ND4	CEBPB	FOS	INSL4	FSTL3
	MT-CO1	RPS15A	MT-ND1	LCMT1-AS2	CD63	EIF1	TFPI
	MT-CO2	RPLP1	MT-ND5	ANXA1	COL4A2	CEBPB	RPL41
	TUBB	RPL13A	MALAT1	SLC43A2	KRT8	HSPB1	RPL37
	MT-ND1	RPS14	APLP2	SLC22A11	C12orf75	SLC40A1	S100A11
	MT-CYB	RPS25	FBN2	SQSTM1	ASCL2	CYP11A1	RPL18A
	HMGN2	RPL11	BCAM	MT-CO1	COTL1	DAB2	IFITM3
	PCLAF	RPL34	SPINT1	PRKCZ	FN1	SQSTM1	COTL1
	CKS1B	PAGE4	APP	KRT23	MFAP5	FDX1	C12orf75
	MT-ND2	RPL26	EFEMP1	ST3GAL4	GLRX	HSPB8	RPS24
	SMC4	RPS3A	EGFR	NEAT1	EFNA1	NUPR1	JPT1
	MT-ATP6	RPL27A	CTSC	TOP1	PPP1R14B	LGALS16	B2M
	TOP2A	RPS6	TINAGL1	CLIP1	TMSB10	HSD17B1	PFN1
	TYMS	RPL35A	PSAP	PGF	DIO2	ARG2	HPGD
	H2AFV	RPL32	PEG3	RRBP1	SLC16A3	TOP1	RPL38
	BIRC5	RPS17	OLR1	MT-CO3	B2M	COX6C	SRI
	NUCKS1	RPL18A	CSF3R	ARID5B	RPS27L	PRKCZ	LGALS1
	CALM2	RPS19	WSB1	UBE2B	KLF6	TAX1BP1	MFAP5
	CENPF	RPS13	BSG	CYP19A1	SOX4	ST3GAL4	IGFBP3
	HNRNPD	RPL35	N4BP2L2	ATP6V0C	LAIR2	UBE2B	RPS18
	RANBP1	RPS24	SLC22A11	COBLL1	LAPTM4A	H3F3B	GLRX
	UBE2S	RPS23	PEG10	S100P	H19	PDLIM2	QSOX1
	MKI67	RPS18	ITIH5	CDKN1C	TFPI	S100A9	RPS27L
	ARL6IP1	RPS28	JUN	TAX1BP1	FXYD5	MUC15	RPL11
	TK1	RPLP0	MEST	SLC13A4	MORF4L2	RPS27	HLA-G
	ANP32B	RPL36A	SPINT2	SLC2A1	MALAT1	RPL34	MT1X
	LSM4	RPL14	FBLN1	ERVW-1	TGFB1	BTG3	RPL39
	HIST1H4C	RPS29	VWA1	MT-CO2	SH3BP5	MAP1LC3B	KRT7
	DUT	RPL7	SLC43A2	EIF4G2	GATA3	ATP6V0C	PLAC8
	PTTG1	RPS3	RRBP1	SECISBP2L	C1QTNF6	RAB11A	LAPTM4A
	RAN	RPS15	SERPINF1	CYP11A1	PGF	ARID5B	GAPDH
	PRC1	RPS20	TGM2	WSB1	ITGB1	RPL21	ISG15
	SRSF2	RPS16	CD46	MT-ATP6	TAGLN2	GDF15	MT1E
	YWHAH	RPL19	PNISR	HSPB8	IFITM3	GABARAPL1	FN1
	NUSAP1	RPL37	BRD4	SLC52A1	TLE5	HMGB3	EBI3
	MT-ND3	RPL27	DDB1	MUC15	EBI3	TMEM40	ASCL2
	HNRNPR	RPL12	SLC2A1	SLC1A2	ITGA5	NFYB	LY6E
	SET	RPL13	CTSL	DAB2	ARID3A	RAP1B	ARHGDIB
	FUS	RPL36	RBM39	NUCB2	PTPRF	FAU	CD63
	HELLS	RPL10A	SLC26A2	PDLIM2	JPT1	ERVW-1	FTH1
	MT-ND5	RPL30	GRN	GDF15	PLAC8	SERP1	TAGLN2
	CCNA2	RPL8	EML4	MT-ND4	ARHGDIB	LGALS13	RPL27
	ZWINT	RPS8	NFE2L3	ABHD5	TCF7L2	PAPOLA	YBX1
	HNRNPAB	RPL10	SIGLEC6	NFE2L3	FLNB	CDKN1C	APOC1
	PCNA	RPL37A	SRSF5	CD63	LIMA1	GSTA3	HTRA4
	H2AFX	RPL15	DSP	MAN1A2	ISG15	ATP6V1G1	RPL10
	HMMR	PTMA	GTF2I	ARID3A	ADAM12	ERVFRD-1	RPL35A
	LDHA	RPL28	TCAF1	KCNN4	MYADM	NUCB2	FXYD5
	TUBB4B	FTH1	FBN1	ZNF292	SRI	RPL23A	HAPLN3
	CENPW	RPL3	LRPAP1	MT-CYB	CALU	SIAH1	CCNE1
	HNRNPU	RPL6	KANK1	RHOBTB1	FLT1	TBX3	IFI27
	SRSF7	RPS7	MAGED1	GABARAPL1	CEBPB	KMO	DIO2
	LMNB1	RPS2	CRIM1	EZR	LRRFIP1	CYP19A1	SPP1
	TMPO	TMSB10	TENM3	TFRC	P4HB	ATP6V1F	PGF
	RPA3	RPS5	COLEC12	RBMS1	NRIP1	MAP1LC3A	MYCNUT
	AURKB	RPS4X	DLG5	TMEM40	TYMP	SERF2	CAPG
	KPNB1	S100A11	CST3	MT-ND3	HLA-G	ZFAND6	MT1F
	HSP90B1	RPL5	NRP2	PAPOLA	ACTB	LCMT1-AS2	RPL26
	SERBP1	RPL22	MYH10	BTG3	BRI3	SERPINB2	RPS17
	HNRNPDL	RPL24	DNMT1	SIAH1	EFHD2	PAIP2	NOTUM
	MZT2B	RPLP2	EXTL2	TCAF1	MT1X	FAR2	RPL32
	ANP32E	UBA52	MIR205HG	SLC16A3	AC211433.1	EIF4G2	SLC16A3
	SMC2	RPSA	ADAMTSL4	HEXIM1	VASP	TINCR	RPS6
	YBX1	GSTP1	SMARCA2	GSE1	NOTUM	MOB4	MMP2
	NASP	RPL39	LAMC1	FAM184A	IL1RAP	RPL41	MIF
	LMNB2	RPL7A	UTRN	SLC26A2	TMED10	RPL39	CSH1
	PTMA	RPL9	KTN1	NECTIN4	NEAT1	RAB9A	RPS13
	DHFR	RPL38	MSI2	KIAA0040	NPC2	EZR	SDCBP
	KPNA2	SNRPD2	ADGRG1	BRAF	XBP1	CMAS	TUBB6
	WDR34	RPL23	TFDP2	LYPD3	KRT7	MTHFS	RPL8
	LY6E	RPL29	MPHOSPH8	AAK1	PRSS8	PDCD4	RPS3A
	NME2	RPL18	GNAS	GREM2	HSPA2	S100A11	RPL13
	HNRNPA2B1	SNHG29	SON	FDX1	APOC1	PHOSPHO1	RPL9
	RRM1	ATP5MG	KCNQ1OT1	AKAP9	GLIPR1	ARL4A	COL4A1
	UBE2C	RPS10	SEMA6A	ESRRG	RFK	RNASEK	MORF4L2
	HNRNPA3	XAGE3	SYNE2	EPAS1	CLTB	OVOL1	AIF1L
	CACYBP	RPS26	TIMP3	MT-ND1	LGALS1	ABHD5	RPS11
	CALM1	SERF2	CDH1	ARG2	LY6K	KIAA0040	GLIPR1
	CDK1	LDHB	ACSS1	CD55	BZW2	ZNF703	LRRC75A
	SMC3	GAPDH	MORC4	NUFIP2	ENG	MIR22HG	TGFB1
	NAP1L1	COX7C	AKAP9	HSD17B1	CD9	MAOA	TSPO
	SNRPB	RPS9	PLPP3	ERVFRD-1	SPARC	PSMC4	DSTN
	DTYMK	RACK1	HSP90B1	RBM47	ADAMTS1	SKP1	HSPA2
	SNRPD1	DBI	TBL1X	MT-ND2	VGLL3	UBE2A	BZW2
	UBE2T	UQCRB	ARL6IP5	ARHGAP24	UPP1	BZW2	GPX4
	ASPM	UQCR10	LAMA5	PRRC2C	MT1F	RPS12	RPS19
	CKS2	PFN1	ITM2B	SEMA6A	AP3S1	BCAR4	RPL36
	CDC20	NDUFA4	DDX17	TCF25	TSPO	SGK1	LITAF
	CCNB2	SPP1	BBX	MAFF	PKP2	CLIC3	RPS29
	MAD2L1	CALM2	VSIR	BACE2	HLA-C	MAFF	PPP1R14B
	KHDRBS1	UBB	ITGB5	SERP1	HPGD	NRBF2	MYL12A
	SIVA1	EEF1G	ATP2B1	MAP1LC3B	FHL2	EIF4A1	TUBA1C
	EIF1AX	EEF1A1	NHLRC3	MIR22HG	SSR4	EDF1	MT1G
	TPX2	POLR2L	LEPROT	MAP1LC3A	CMTM3	HIGD1A	ADAM12
	DIAPH3	NACA	PDIA3	HDAC5	ITM2B	CGB3	LDHA
	GMNN	ATP5MF	DOCK8	H3F3B	HAPLN3	OAZ1	TLE5
	RAD21	ATP5MC2	DPP4	SLC19A2	FSTL1	RAB1A	SELENOM
	HMGN1	ATP5F1E	KDM5B	PIK3C2A	CDKN1C	RPL24	GCM1
	SFPQ	RPS11	SLC27A2	APMAP	SSR3	HEXIM1	SH3BGRL3
	CENPN	TMA7	FOS	SLC3A2	CITED2	RPS27A	RPL29
	RRM2	ATP5ME	MAGED2	BZW2	YWHAZ	DNAJB9	SSR3
	CCNB1	BEX3	ORMDL1	B3GNT5	HTRA4	NDUFA6	EEF1A1
	PDIA6	HMGB1	ALDH7A1	DDX5	CAPG	GABARAP	CGA
	HSP90AA1	SLIRP	SLC6A4	ZNF703	ANXA4	XAGE3	C1orf56
	BSG	ACTB	CCNL1	TACC2	MYCNUT	BPGM	ITM2B
	VKORC1	FAU	IGDCC3	NECTIN3	JAK1	RPS25	RPS9
	ORC6	NDUFB2	ECHDC2	PHLDA2	PSAP	RPS13	CALD1
	CENPM	RPL36AL	AGL	IDS	CCNE1	RPS28	ACTG1
	ILF3	SNRPE	FUCA1	EIF1	SDCBP	RPLP2	MT1H
	PRDX4	HINT1	ITGA6	KMT2C	PLK2	RPS14	S100A4
	PAXX	PRDX2	IFI6	FAM13A	TUBB6	RPL26	SEC61G
	CCDC34	SNRPG	FOLR1	EPS8L1	MXRA8	KYNU	CLTB
	LSM5	LRRC75A	MT-ND6	CEBPA	AFAP1	CCNDBP1	EFNA1
	BUB3	LSM3	TPST2	ATP6V1G1	TIMP1	GREM2	TYMP
	NOP56	UQCRQ	PBX1	EPHB4	PLCL2	PIM3	SERPINE2
	PA2G4	PHLDA2	HOOK2	TOX4	PTN	MYO10	RPL23A
	CENPU	PRDX1	WLS	SPAG9	LHFPL6	TBPL1	CA2
	GTSE1	MT2A	SLC12A9	ATP10D	MT1E	ADHFE1	RPLP0
	TOMM40	SNRPD1	IDH1	DHX36	ABCA7	OTUB2	SOX4
	TMEM97	VGLL1	DLG1	ATG9B	FOSL2	HMOX1	C4orf48
	PSIP1	ATP5IF1	FTX	OVOL1	F11R	YPEL5	PTN
	PPIA	ATP5PD	FRMD4A	RASA1	ISM2	FAM104A	RPL35
	DNAJC9	TUBA1B	CD59	HSPA5	RALBP1	HOPX	NPC2
	CCT6A	PSME1	F5	PDCD4	BCAR4	RPLP1	ABCA7
	ERH	FKBP3	RTN4	SLC38A9	EPAS1	RPL13A	CMTM3
	CDKN3	SMAGP	LAMB1	SERPINB2	AIF1L	COQ10B	RPL37A
	SRSF10	CDK1	CDK6	CPEB4	DOCK5	AKR1B1	BST2
	SMC1A	SKP1	LARGE2	CDYL	ADM	BTG1	ANXA4
	LBR	ATP5PO	DEGS1	GATA3	PLOD1	TPT1	CITED2
	H1FX	GGCT	CLDN4	RAB9A	MFAP2	DHRS9	PRG2
	SRSF3	SNRPC	POLR2J3	NUPR1	CD276	ATP6V1E1	RPS15A
	NUF2	NDUFS5	NKTR	AP2A1	HTRA1	VGLL1	TIMP1
	SSRP1	PSMA4	LGR5	LINC01949	SAT1	HBP1	BCAR4
	SEC11A	ATP5MC3	DAG1	SLC19A1	FNDC3B	DCTN6	LY6K
	CDCA3	MIF	GLG1	TINCR	RABAC1	RPL17	RPL30
	PHGDH	NDUFA11	FOSB	SIN3B	RHOBTB3	CEBPA	PLIN2
	ASF1B	NPM1	SERINC2	CRYBG1	FOSB	EPS8L1	RPS27
	TUBA1C	AC092718.6	P4HB	RYBP	SH3BGRL3	ARF4	FABP5
	COX8A	ESD	AHNAK	HSPB1	SDC4	RBM42	KRT18
	GGCT	SOD1	WASF2	MYO10	PLIN2	UBA52	MYL6
	P4HB	ATP5MPL	PNRC1	NRBF2	TIMP2	LYPD3	TNFSF10
	TRIM28	GSTO1	SEC62	SGK1	LGALS3BP	SH3BP5	AC092069.1
	DHTKD1	UQCRH	TMEM59	RAI14	MYH9	RPL31	PPIB
	CALM3	S100A10	HSPA5	HERPUD1	PPIB	SECISBP2L	CD9
	RNPS1	TUBB	ARGLU1	RAB11A	LITAF	TOX4	C1QTNF6
	ANLN	C1orf56	GSTK1	BTG1	PDIA6	RPL10	EFHD2
	PBK	HSPE1	NR2F2	NFKBIA	SLCO4A1	SEM1	RPL17
	DEPDC1	CD14	CLTC	CCNDBP1	GRB2	RAB2A	JAK1
	TPM3	F13A1	SELENOP	SLC49A4	HSP90B1	NAGK	UPP1
	CDT1	HMGA1	ITGAV	SERINC5	ATF3	KISS1	RPS27A
	KIF23	TIMM8B	MET	ARL4A	GALNT1	BACE2	SFRP1
	HACD3	COX7B	CAMK2G	MT-ND5	COL27A1	FXYD3	SNHG5
	CDCA4	ATP5MC1	PHACTR2	PIM3	KRTCAP2	AKIRIN2	TNNI2
	CCT5	HNRNPA1	MPZL1	CSNK1A1	JUND	UBE2D1	MXRA8
	DDX39A	PRDX5	YAP1	MAFK	CCN1	NACA	RFK
	MEST	NDUFS6	BMP7	BASP1	KDELR2	RPS20	ITGA5
	PNN	UBE2C	CSF2RA	DHRS9	RGS16	RPS11	EPSTI1
	FDPS	H3F3A	PLD3	LGALS16	PTGES	RPL30	TFPI2
	EBP	STMN1	LRP2	GOLGA4	PDLIM5	HES1	HLA-C
	SNRPG	TYROBP	SF1	APLP2	SLC2A3	ALAS1	GLO1
	TACC3	C1QA	UBE2H	FAR2	SELENOM	RBM8A	PLK2
	TFDP1	NUSAP1	CLN3	TUT7	CEBPD	KRT8	RPLP1
	TOMM5	FOLR2	DDX5	HLA-E	HLA-E	CHMP4B	TUBB
	CARHSP1	ACOT13	ANKH	DNAJB9	CALR	ARHGAP18	SSR4
	NCL	CLTA	CRYBG1	RAP1B	GJA5	PLIN2	TIMP2
	PGP	RPS21	NF1	KDM5B	TPM4	RNF11	FABP7
	CLSPN	HMGN2	FOXO4	GSTA3	MBD2	DNAJB4	MFAP2
	CYC1	CSTA	ATP6AP2	TPM4	SLC39A8	ATP6V1D	AP3S1
	APLP2	XAGE2	PTTG1IP	MLLT1	TMED2	NEURL1	AC211433.1
	MT2A	FCER1G	PARP1	UTRN	GPR146	IGSF5	ANXA2
	PRKDC	AIF1	SRSF11	NFYB	TNFAIP3	CLTA	CCNB1
	C19orf48	MEF2C	TMBIM6	SIAH2	GATA2	ISG20	RGS16
	CDCA5	LY96	GJA1	OTUB2	FBLIM1	SUB1	FLT1
	PTGES3	MYL6	SLC40A1	PLAC4	SYT8	OSER1	PHKG1
	HSPD1	TOMM7	ADAMTS6	GRN	MMP14	MAP3K8	VASP
	B2M	ANXA5	TMED4	VAV3	MBNL2	PMAIP1	LIMA1
	ATAD5	MYCBP	EGR1	KMO	IL1R1	SDC1	RALBP1
	CALR	POLR2G	DUSP9	ATXN7	LMAN1	HNRNPH2	RPLP2
	C1QBP	EIF3E	FUS	CPM	SERPINE2	PHYHIPL	TNFAIP2
	SRRM2	RNASE1	NCOA3	BCORL1	CLDN19	ATP6V0D1	FOS
	CKAP2	PCNA	NEAT1	PEG3	HSD3B1	GPR87	SDC4
	HNRNPF	VAMP8	ITGB4	RNASEK	C4orf48	NFKBIA	TXN
	NCAPG	CD36	LRP1	ARHGAP18	KDELR1	PSMA1	SH3BP5
	CENPK	EEF1B2	RSRP1	APP	SEMA4C	CKB	CSTB
	PTMS	ECI2	JUND	MIDN	CAP1	TRAPPC2B	C8orf31
	SNRPF	C1QB	TLE4	ERC1	ACTN1	KRT18	RPS7
	MCM7	TMSB4X	IL10RB	CMAS	TMEM50A	COX7B	NME2
	USP1	C1QC	BCAP31	PAIP2	OPN3	SEC61G	TPM4
	KIF22	ECH1	ASPH	ZFAND6	P4HA1	DPEP2NB	ID3
	MYBL2	GCHFR	EIF4A2	GNAS	EIF4EBP1	SLC13A4	CLIC3
	MZT2A	SUCLG1	TMEM150C	ERVV-1	PDIA4	DEDD2	ADA
	RCN2	NDUFB3	PISD	IGSF5	NLRP2	AATF	CHCHD10
	TUFM	SCN9A	FOXP1	SEMA7A	PXN	GSKIP	MMP12

## Sheet: Table_S6
Table S6: Genes upregulated in CTB3 (late 1st Trimester) vs CTB1 and CTB2 (Early 1st Trimester)
Gene Names	LogFoldChange CTB3 vs CTB1	LogFoldChange CTB3 vs CTB2
OLR1	1.29571	2.18099
VSIR	1.0365	2.30325
SLC40A1	1.09095	2.57929
SLC22A11	1.11126	3.08651
FLT1	1.08525	3.76532
CSF3R	1.2274	4.0569
KDM5B	1.22204	4.07547
FBN1	1.02146	4.76168
MALAT1	1.05998	5.28079
CCDC18-AS1	1.05378	5.67102
Genes upregulated in CTB1 and CTB2 (Early 1st Trimester) compared to CTB3 (late 1st Trimester)
Gene Names	LogFoldChange CTB1 vs CTB3	LogFoldChange CTB2 vs CTB3
CENPA	5.29252	3.58704
PBK	5.12122	3.93013
NEK2	5.0801	3.3148
SPC25	5.05929	3.94535
CCNA2	4.96927	3.53504
DLGAP5	4.96838	3.33046
NDC80	4.88773	3.32255
GTSE1	4.84736	2.8257
KIF20A	4.74105	2.1888
CDCA3	4.69842	2.96421
CEP55	4.67433	2.85183
UBE2C	4.66213	3.42305
NUF2	4.48281	2.75628
CKAP2L	4.44336	1.79071
KIF2C	4.42386	2.89357
KIF4A	4.4155	2.31947
AURKB	4.38333	2.71045
CDCA8	4.3654	2.81085
RRM2	4.35462	2.67508
CDKN3	4.35229	2.93067
PLK1	4.33026	2.86525
NUSAP1	4.31607	3.05008
NCAPH	4.25054	2.31535
SKA1	4.23255	2.80879
BUB1B	4.22154	2.07363
BIRC5	4.21389	2.80331
CDK1	4.16595	3.20878
TPX2	4.15251	1.91814
HIST1H1A	4.12994	1.49077
KIFC1	4.12356	2.01449
HIST1H1D	4.10787	1.00611
PSRC1	4.09738	2.53186
CDC20	4.08046	2.67052
HJURP	4.02207	2.19164
CCNF	4.02128	1.14124
BUB1	4.01188	2.3028
FOXM1	4.00046	1.3332
NCAPG	3.99125	1.83738
KIF15	3.97755	1.52328
DEPDC1B	3.91401	2.23567
ARHGEF39	3.90764	2.0104
DEPDC1	3.90561	2.21076
TACC3	3.89746	1.9623
CDCA2	3.86227	1.64521
ARHGAP11A	3.84699	1.30615
PKMYT1	3.79054	1.17607
MND1	3.78255	2.24945
CDCA5	3.77911	2.04016
SPAG5	3.76244	2.19043
FABP5	3.74688	2.59792
ESCO2	3.65862	1.77546
PTTG1	3.62438	2.18769
ASF1B	3.61983	2.12017
SKA3	3.53754	1.88084
EXO1	3.45004	1.35288
UHRF1	3.42183	1.02189
RAD54L	3.41916	1.09451
MXD3	3.3535	1.64004
SHCBP1	3.34266	1.55918
KIF23	3.34189	1.31356
SPC24	3.30814	2.01455
MELK	3.29597	1.6165
TROAP	3.24604	1.31259
CCNE2	3.23752	1.75817
DSCC1	3.21574	2.14917
MARCKSL1	3.21297	1.33209
AURKA	3.20675	2.02752
RAD51AP1	3.20409	2.11983
MAD2L1	3.19304	1.96788
CLSPN	3.14644	1.16065
CDC25C	3.12918	1.38422
FAM83D	3.07751	1.66248
CENPU	3.01562	1.66872
CCNB1	2.95506	1.55437
CENPM	2.94341	1.65922
EIF4EBP1	2.87747	1.21991
CENPW	2.86933	1.72893
FXYD5	2.86577	1.06618
CCNB2	2.83211	1.48705
CENPK	2.78514	1.66613
TTK	2.75529	1.46029
POC1A	2.64844	1.1339
OIP5	2.64377	1.06988
RAD51	2.64132	1.12498
UBE2T	2.60117	1.38504
CENPN	2.48085	1.31263
TUBA1B	2.33453	1.21561
PCNA	2.21807	1.19289

## Sheet: Table_S7
Table S7: Genes upregulated in CTB1 (Early 1st Trimester) vs CTB2 (Early 1st Trimester)
Gene Names	logfoldchanges	pvals	pvals_adj
MT-CO1	6.13105	0	0
MT-CO3	5.97974	0	0
MT-ND1	5.9418	0	0
MT-ND4	5.72512	0	0
COL4A2	5.65522	0	0
MT-CO2	5.61927	0	0
MT-CYB	5.61922	0	0
MT-ATP6	5.56412	0	0
MT-ND2	5.45458	0	0
MT-ND4L	5.39025	0	0
MT-ND5	5.33433	0	0
SPTBN1	5.2363	0	0
MT-ND3	5.13144	0	0
GANAB	5.09941	0	0
CD81	4.96536	0	0
POLR2J3	4.95171	0	0
ATP2A2	4.93578	0	0
KANSL1	4.90719	0	0
LTBP1	4.84951	0	0
AFF4	4.84146	0	0
PABPN1	4.752	0	0
MACF1	4.72039	0	0
ADAMTS1	4.71998	0	0
SLC38A2	4.66567	0	0
LRP1	4.59091	0	0
THUMPD3-AS1	4.57405	0	0
FOSB	4.57001	0	0
LMF2	4.55503	0	0
IL6ST	4.53939	0	0
ARHGAP24	4.46176	0	0
SEC61A1	4.42701	0	0
ARID1B	4.40638	0	0
KCNQ1OT1	4.3989	0	0
AHNAK	4.38195	0	0
KLF6	4.37871	0	0
GABPB1-AS1	4.37527	0	0
ARID1A	4.34679	0	0
LAMB1	4.34362	0	0
NKTR	4.3074	0	0
MMP14	4.2773	0	0
MARCH6	4.27126	0	0
MALAT1	4.2208	0	0
COL4A1	4.21789	0	0
POR	4.19805	0	0
ADAR	4.19716	0	0
CCDC14	4.18592	0	0
GLG1	4.18073	0	0
SLC38A10	4.15806	0	0
DLG1	4.09958	0	0
LAMC1	4.09838	0	0
ATP13A3	4.09492	0	0
TUG1	4.06975	0	0
VCL	4.06438	0	0
ATP1A1	4.05982	0	0
RPN1	4.05757	0	0
USP22	4.05631	0	0
NHLRC3	4.05347	0	0
SERPINH1	4.01913	0	0
SPG7	4.01561	0	0
SPARC	4.01049	0	0
LGALS3BP	3.99668	0	0
ATF6B	3.97381	0	0
LINC01578	3.9687	0	0
TM9SF2	3.96637	0	0
CCNL1	3.96174	0	0
NEAT1	3.92457	0	0
MT-ND6	3.92224	0	0
PNISR	3.92116	0	0
JMJD1C	3.91894	0	0
COPA	3.91114	0	0
TMEM259	3.89867	0	0
IQGAP1	3.89311	0	0
ANKRD11	3.88914	0	0
TRIM33	3.88046	0	0
DYNC1H1	3.87496	0	0
LMO7	3.85235	0	0
MDM4	3.83672	0	0
RBBP6	3.82417	0	0
KTN1	3.81663	0	0
FSTL1	3.81316	0	0
DPP4	3.80477	0	0
BRD2	3.79072	0	0
NSD1	3.78512	0	0
TRIM56	3.78273	0	0
FTX	3.76867	0	0
LAMA5	3.76732	0	0
GAA	3.76522	0	0
NECTIN2	3.74379	0	0
FBN1	3.74022	0	0
BDP1	3.73951	0	0
NIPBL	3.73835	0	0
HECTD1	3.72929	0	0
CELF1	3.72658	0	0
BPTF	3.71941	0	0
PHACTR2	3.71583	0	0
ACTN4	3.71491	0	0
CHD4	3.7093	0	0
TEAD1	3.70088	0	0
CLK1	3.69975	0	0
OS9	3.69167	0	0
JUND	3.69086	0	0
LMBRD1	3.67656	0	0
GJA1	3.67108	0	0
SEC31A	3.66295	0	0
MYH9	3.65734	0	0
TMEM41B	3.65215	0	0
NR2F6	3.64612	0	0
WAC	3.64306	0	0
RNF149	3.64068	0	0
NRP2	3.6276	0	0
ITGB1	3.61566	0	0
AFDN	3.6146	0	0
RSRP1	3.605	0	0
TGOLN2	3.60163	0	0
ASPM	3.60107	0	0
THOC2	3.60082	0	0
CTDNEP1	3.59885	0	0
LARP1	3.59449	0	0
AKAP9	3.58727	0	0
TMEM245	3.57004	0	0
JUNB	3.56837	0	0
PLPP3	3.56827	0	0
WSB1	3.56654	0	0
HOOK2	3.56268	0	0
PKN2	3.54156	0	0
TTC3	3.53826	0	0
CREB3L2	3.52949	0	0
HSPA5	3.51999	0	0
HIST1H4C	3.51639	0	0
PHKB	3.50938	0	0
TACC1	3.50931	0	0
ASH1L	3.50013	0	0
RBM26	3.49657	0	0
CALU	3.49012	0	0
STT3B	3.48995	0	0
GRN	3.48518	0	0
DSG2	3.48147	0	0
ZFHX3	3.47836	0	0
PPIC	3.47288	0	0
VMP1	3.47167	0	0
SF1	3.46579	0	0
RRBP1	3.45863	0	0
UBE2M	3.44548	0	0
HSP90B1	3.42767	0	0
XPO1	3.42442	0	0
SGCE	3.41913	0	0
PPP4R3A	3.41635	0	0
GOLGA4	3.41221	0	0
GNAQ	3.40721	0	0
NUCB1	3.40667	0	0
ALYREF	3.38936	0	0
EIF3B	3.38693	0	0
PPP1R15A	3.38515	0	0
PTPRF	3.38314	0	0
GCC2	3.38026	0	0
ILVBL	3.37828	0	0
SYNE2	3.37636	0	0
ADAMTSL4	3.36978	0	0
RBM5	3.36838	0	0
CLIP1	3.36252	0	0
LMAN1	3.36203	0	0
XBP1	3.35776	0	0
CHPF	3.35589	0	0
DDX17	3.34741	0	0
RBMS1	3.34545	0	0
SLC44A2	3.34387	0	0
PNN	3.33968	0	0
SEC63	3.33324	0	0
SREK1	3.32665	0	0
ATRX	3.32558	0	0
RIF1	3.32392	0	0
FBN2	3.32309	0	0
TMEM87A	3.32202	0	0
ITGB5	3.32061	0	0
GOLGB1	3.30645	0	0
FRMD4A	3.29913	0	0
LBR	3.29679	0	0
ZNF638	3.2911	0	0
SUZ12	3.29025	0	0
GSE1	3.28367	0	0
ARID4B	3.267	0	0
MYCBP2	3.25711	0	0
CDH1	3.24758	0	0
DICER1	3.24689	0	0
FAM120A	3.23069	0	0
QKI	3.22994	0	0
UBE2R2	3.22307	0	0
UFL1	3.21488	0	0
ROCK1	3.21358	0	0
MAN1A2	3.20471	0	0
PHIP	3.19919	0	0
FNBP4	3.19799	0	0
CDK12	3.18323	0	0
CANX	3.18281	0	0
RSBN1L	3.17511	0	0
TM9SF3	3.17208	0	0
N4BP2L2	3.17067	0	0
NSD3	3.15972	0	0
EGR1	3.14589	0	0
YME1L1	3.13979	0	0
ZNF106	3.13467	0	0
DAG1	3.13074	0	0
FOXP1	3.1196	0	0
TRIM28	3.11481	0	0
MCL1	3.11413	0	0
PRPF38B	3.10611	0	0
SLC16A1	3.1014	0	0
GNAI2	3.0967	0	0
KHSRP	3.0959	0	0
SSBP3	3.0927	0	0
PDIA4	3.09203	0	0
TRIOBP	3.08751	0	0
NF1	3.08157	0	0
PSAP	3.08092	0	0
DSP	3.07945	0	0
AHCYL1	3.07192	0	0
MME	3.07173	0	0
ATP6AP1	3.05776	0	0
COLEC12	3.05001	0	0
UBE2S	3.04735	0	0
MKI67	3.0257	0	0
HIC2	3.02115	0	0
HEXA	3.0112	0	0
CENPF	3.00708	0	0
WEE1	2.99833	0	0
UBE3A	2.99372	0	0
FBLN1	2.99186	0	0
CTNND1	2.99013	0	0
ABHD17A	2.98514	0	0
DHTKD1	2.98497	0	0
PPP1R12A	2.98351	0	0
TUT4	2.97	0	0
MDK	2.96764	0	0
SLC3A2	2.96428	0	0
TIMP3	2.94825	0	0
LIMS1	2.93522	0	0
PCOLCE2	2.93505	0	0
TENM3	2.93127	0	0
APP	2.92489	0	0
ZFP36L1	2.91875	0	0
MTF2	2.91646	0	0
SLC39A10	2.91546	0	0
STK24	2.91445	0	0
FUS	2.91393	0	0
PRKCSH	2.91079	0	0
ATF3	2.90612	0	0
SMCHD1	2.90484	0	0
NPEPPS	2.90359	0	0
ATP2B1	2.90296	0	0
RPN2	2.90005	0	0
SEMA6A	2.8995	0	0
DSC3	2.89872	0	0
ITGA6	2.89088	0	0
GTF2I	2.88178	0	0
SMC4	2.87729	0	0
DNAJB11	2.87671	0	0
EIF4G1	2.87304	0	0
LUC7L3	2.87255	0	0
ARGLU1	2.86708	0	0
TCERG1	2.86663	0	0
IPO7	2.85962	0	0
NCOR1	2.85928	0	0
ENAH	2.85024	0	0
GPAA1	2.85006	0	0
CHD2	2.84892	0	0
MINDY2	2.84834	0	0
DDX3X	2.83219	0	0
CSF3R	2.82951	0	0
NOC2L	2.82187	0	0
RBM25	2.82077	0	0
KPNB1	2.8177	0	0
TRIM44	2.81342	0	0
SMC1A	2.80874	0	0
EGFR	2.79789	0	0
VWA1	2.7944	0	0
ZC3H13	2.79319	0	0
EPAS1	2.79305	0	0
ACTN1	2.78926	0	0
HELLS	2.78907	0	0
TMBIM6	2.78303	0	0
CLTC	2.77827	0	0
IGDCC3	2.7782	0	0
CCDC47	2.77816	0	0
CCAR1	2.77765	0	0
PHF14	2.77198	0	0
PDIA3	2.76634	0	0
P4HB	2.76319	0	0
HM13	2.76292	0	0
ISM2	2.74999	0	0
SFXN1	2.74588	0	0
GNB1	2.74366	0	0
EMC10	2.73723	0	0
SURF4	2.73323	0	0
BAZ1B	2.73059	0	0
APLP2	2.71187	0	0
CTSB	2.70377	0	0
F11R	2.70037	0	0
CHD1	2.68428	0	0
PEG3	2.68375	0	0
SRSF6	2.68297	0	0
SPPL2A	2.68003	0	0
KIF5B	2.67768	0	0
NEMF	2.67248	0	0
MPZL1	2.67061	0	0
SSR1	2.66583	0	0
WLS	2.65382	0	0
CYBA	2.65362	0	0
SQLE	2.64579	0	0
SEC62	2.63978	0	0
CRIM1	2.6376	0	0
CTSC	2.63723	0	0
TMED10	2.63656	0	0
ADGRG1	2.63459	0	0
ARID3A	2.63375	0	0
AAK1	2.62874	0	0
CALD1	2.6226	0	0
MYH10	2.62197	0	0
MLEC	2.62032	0	0
SMARCA4	2.61907	0	0
SRRM2	2.59957	0	0
LAMP1	2.59856	0	0
LMNB2	2.59535	0	0
RCN1	2.59457	0	0
DSC2	2.59159	0	0
NFE2L3	2.58983	0	0
GPBP1	2.58862	0	0
PDIA6	2.58716	0	0
PRRC2C	2.58529	0	0
BMP7	2.58333	0	0
PAWR	2.58314	0	0
HDGF	2.58102	0	0
TCAF1	2.56984	0	0
UTRN	2.56957	0	0
PCM1	2.56891	0	0
CD151	2.56795	0	0
TMEM165	2.5528	0	0
H1FX	2.54561	0	0
PHF3	2.54388	0	0
NR2F2	2.54125	0	0
CCR7	2.53998	0	0
SCAF11	2.53507	0	0
IARS2	2.53492	0	0
JPX	2.52545	0	0
SDF4	2.50031	0	0
TRAM1	2.49983	0	0
BCAM	2.49491	0	0
RBM47	2.49095	0	0
SLC38A1	2.47939	0	0
EML4	2.47873	0	0
TPR	2.47679	0	0
ASPH	2.47282	0	0
PDCD7	2.4722	0	0
BCLAF1	2.47157	0	0
JUN	2.46811	0	0
BASP1	2.46325	0	0
ERP44	2.46322	0	0
PPP1R14B	2.46126	0	0
CD63	2.45194	0	0
PRKDC	2.45131	0	0
LSR	2.4335	0	0
EIF3A	2.41795	0	0
HP1BP3	2.39783	0	0
SNHG3	2.39198	0	0
CD46	2.36971	0	0
ZFAND5	2.3664	0	0
SELENOS	2.36205	0	0
HNRNPD	2.3594	0	0
SMARCA2	2.35826	0	0
ITIH5	2.3428	0	0
ACIN1	2.34049	0	0
LAPTM4A	2.3328	0	0
TMED9	2.3153	0	0
SF3B1	2.31483	0	0
SIGLEC6	2.31032	0	0
PRDX4	2.30964	0	0
LIMA1	2.28874	0	0
SON	2.28613	0	0
HNRNPU	2.28524	0	0
SMARCC1	2.27371	0	0
APMAP	2.27175	0	0
SRSF1	2.26586	0	0
TOP2A	2.25515	0	0
SLC26A2	2.24743	0	0
SLC2A1	2.24571	0	0
HACD3	2.24285	0	0
LMAN2	2.23247	0	0
CD99	2.23177	0	0
AUP1	2.23162	0	0
YTHDC1	2.22986	0	0
CALR	2.22257	0	0
DNAJB1	2.21998	0	0
LRPAP1	2.21992	0	0
IER2	2.21336	0	0
ILF3	2.21119	0	0
ANAPC5	2.20483	0	0
FOS	2.20368	0	0
TRA2A	2.19825	0	0
LEPROT	2.19089	0	0
DHX36	2.18271	0	0
SRSF10	2.16887	0	0
SFPQ	2.16218	0	0
SYNCRIP	2.15958	0	0
CDV3	2.15846	0	0
PTBP1	2.14228	0	0
ATP1B3	2.12463	0	0
BSG	2.11977	0	0
TPM4	2.11529	0	0
SRSF11	2.09076	0	0
MSI2	2.08571	0	0
MPHOSPH8	2.07603	0	0
CSNK1A1	2.07354	0	0
CLDN4	2.07349	0	0
SRSF4	2.06436	0	0
SRSF5	2.06094	0	0
SMC3	2.04719	0	0
UBXN4	2.0438	0	0
BRD4	2.04063	0	0
RCN2	2.03269	0	0
SKP2	2.023	0	0
SARAF	2.02112	0	0
CD164	2.02018	0	0
RNPS1	2.01471	0	0
GATA3	2.00901	0	0
YWHAZ	2.00506	0	0
SLC39A1	2.00261	0	0
TRA2B	1.98306	0	0
DDX46	1.97884	0	0
SLC22A11	1.97525	0	0
REEP5	1.97473	0	0
YBX3	1.97348	0	0
MYDGF	1.97136	0	0
ATP6V0B	1.96695	0	0
ARL6IP1	1.96685	0	0
PRPF40A	1.95676	0	0
RBM39	1.95564	0	0
YY1	1.95078	0	0
SEPTIN11	1.93916	0	0
PPIG	1.93532	0	0
BBX	1.93155	0	0
SLC43A2	1.91733	0	0
PCBP1	1.90299	0	0
BRI3	1.87624	0	0
SEPTIN2	1.87507	0	0
RAD21	1.86797	0	0
TAF1D	1.86781	0	0
KDELR2	1.8636	0	0
SRSF2	1.86258	0	0
SRSF7	1.85964	0	0
TUFM	1.85432	0	0
DEK	1.84593	0	0
KRTCAP2	1.82176	0	0
SPCS2	1.82068	0	0
ATF4	1.82022	0	0
EIF4H	1.81793	0	0
CTSL	1.81637	0	0
EWSR1	1.81626	0	0
EIF5	1.79821	0	0
TUSC3	1.79421	0	0
MESD	1.77619	0	0
RTN4	1.77479	0	0
EFEMP1	1.77174	0	0
THRAP3	1.77085	0	0
TECR	1.76522	0	0
TMEM59	1.74935	0	0
MEST	1.72553	0	0
CMTM6	1.72452	0	0
KDELR1	1.72134	0	0
DDB1	1.71594	0	0
DDOST	1.71243	0	0
EIF4B	1.70134	0	0
HMGB2	1.68719	0	0
HNRNPAB	1.68501	0	0
BCAP31	1.68432	0	0
PABPC1	1.67545	0	0
KHDRBS1	1.66968	0	0
TOMM20	1.65832	0	0
SPINT1	1.65607	0	0
ATRAID	1.65387	0	0
NUCKS1	1.64423	0	0
OSTC	1.63841	0	0
CST3	1.63162	0	0
NPC2	1.62612	0	0
H2AFZ	1.6172	0	0
EIF1AX	1.59427	0	0
B2M	1.58013	0	0
PCBP2	1.55457	0	0
HNRNPR	1.55009	0	0
ERP29	1.52724	0	0
ARF1	1.52017	0	0
H2AFV	1.50541	0	0

## Sheet: Table_S8
Table S8: Genes upregulated in CTB2 (Early 1st Trimester) vs CTB1 (Early 1st Trimester)
Gene Names	logfoldchanges	pvals	pvals_adj
AP000439.2	21.0655	0.00362438	0.00670375
CD180	5.67468	0.0114835	0.0202455
TMEM150B	5.58925	0.029067	0.0484474
GPR34	4.88377	2.9115e-07	6.46264e-07
SIGLEC14	4.74857	0.00564371	0.0102781
TSPAN7	4.74814	0.012488	0.0219222
MNDA	4.70108	4.05804e-05	8.41515e-05
LINC01229	4.67752	0.0132987	0.0232441
LY96	4.59908	5.16303e-13	1.29516e-12
MARCO	4.59645	0.00825967	0.0148151
SLC9A9	4.40477	9.30129e-05	0.000189674
PIK3CG	4.37087	0.0229317	0.0388219
PARP15	4.29963	0.0155525	0.0269392
MEF2C	4.18992	1.7305e-11	4.22398e-11
TLR4	4.11942	1.68195e-05	3.54419e-05
MS4A7	4.03601	0.000264554	0.000527523
NAV3	3.98743	0.0246674	0.0415568
RNASE6	3.9265	0.000393607	0.000777458
OTOA	3.81922	0.000142948	0.000289022
LCP2	3.78973	0.000215168	0.000430984
BCL11A	3.76596	0.0263603	0.0442268
NNMT	3.73817	0.00168859	0.00320706
SCN1A-AS1	3.69829	8.76519e-05	0.000178934
LPAR6	3.69065	1.85248e-05	3.8952e-05
CD28	3.63445	0.00115752	0.0022251
F13A1	3.61162	6.9768e-21	1.96019e-20
FOLR2	3.59896	3.44502e-16	9.08996e-16
SCN9A	3.5869	2.36844e-08	5.4119e-08
SIGLEC1	3.33419	0.00017288	0.00034801
ALOX5AP	3.32638	2.27383e-05	4.75936e-05
C3AR1	3.28546	0.00249278	0.00467636
TIMD4	3.26827	0.0150431	0.026096
CYBB	3.26746	4.66499e-05	9.65197e-05
GAPLINC	3.25396	0.0135895	0.0237307
LINC01094	3.21418	0.00166075	0.0031562
AIF1	3.18403	1.25754e-12	3.13625e-12
TMIGD3	3.15766	0.00600365	0.0109045
LYVE1	3.12469	1.0351e-09	2.43976e-09
IGSF6	3.07217	2.18919e-05	4.58654e-05
HCST	2.99194	7.98351e-07	1.75291e-06
MS4A6A	2.91664	1.52425e-05	3.21775e-05
CD84	2.90236	0.000877603	0.00169817
HPGDS	2.89902	2.14649e-08	4.9098e-08
NCKAP1L	2.89511	0.00103883	0.00200201
TYROBP	2.84726	1.09196e-14	2.81947e-14
MAF	2.84492	9.65888e-08	2.17145e-07
IGF1	2.84213	0.000275675	0.000549122
SCN1B	2.81654	0.0256645	0.0431329
CD163	2.80255	5.94607e-07	1.30944e-06
CD14	2.79059	1.70864e-20	4.77387e-20
LILRB5	2.78426	0.00241256	0.00453161
LST1	2.76301	0.000466405	0.000916964
PCDH12	2.76012	0.029236	0.0486956
RNASE1	2.7293	1.22471e-11	2.99881e-11
C1QC	2.72655	2.67476e-09	6.24424e-09
C1QA	2.72442	6.75196e-14	1.72149e-13
CD5L	2.71753	0.00518678	0.00947706
VSIG4	2.7048	5.64496e-09	1.30795e-08
FGD2	2.7028	0.00288728	0.00538606
RENBP	2.6566	0.00106101	0.00204341
SPP1	2.65576	6.46609e-116	4.46818e-115
PTPRC	2.6335	0.00366657	0.00677756
MRC1	2.61893	0.000237092	0.000473757
C1QB	2.59617	5.19649e-09	1.20478e-08
HAVCR2	2.59341	0.00803083	0.0144212
FCER1G	2.58159	2.77779e-13	7.00051e-13
CYTH4	2.53234	0.000280964	0.000559406
LPAR5	2.50155	0.0129676	0.0227101
PLEK	2.47352	0.000189317	0.000380291
PCED1B-AS1	2.45598	0.0130323	0.0228115
MSR1	2.43301	0.0109747	0.0194141
MS4A4A	2.42101	0.000368625	0.000729142
BCL2A1	2.35582	0.0155029	0.0268551
GIMAP4	2.34827	0.00624786	0.0113341
RASSF4	2.3351	2.86066e-05	5.96514e-05
PTPRO	2.33455	0.0295753	0.0492268
SPI1	2.32225	0.00012024	0.000244057
S100A1	2.28709	0.000251609	0.000502161
MARCH1	2.27867	0.00175314	0.00332728
CTSS	2.1922	1.76721e-05	3.72148e-05
CD36	2.17932	4.59898e-09	1.06811e-08
CD4	2.17716	0.0183059	0.0314243
ZEB2	2.16938	4.30814e-05	8.92683e-05
CCL2	2.11913	0.000402063	0.000793632
ALDH1A1	2.07785	0.0012586	0.00241295
SLCO2B1	2.07457	0.0124406	0.0218461
TMEM273	2.06333	0.0145362	0.0252908
PLA2G7	2.05725	0.000375025	0.000741636
SLA	2.0466	0.0259715	0.0435964
FCGR2A	2.04221	0.0270985	0.045391
LAPTM5	1.98316	0.000607142	0.00118525
CCL3L1	1.97297	6.10631e-05	0.000125541
ITGB2	1.97006	0.000880851	0.00170433
ARHGAP30	1.93082	0.0215198	0.0365758
CCL3	1.85812	9.40003e-09	2.16895e-08
CD37	1.85389	0.0082939	0.0148725
CCL4L2	1.83581	0.00422542	0.00777224
GYPC	1.8319	0.00197293	0.00373095
LRRC39	1.75059	0.0160501	0.0277363
S100A8	1.74037	0.0156553	0.027105
AC117503.1	1.70179	0.0132143	0.0231103
TNFAIP2	1.69751	0.000248605	0.000496351
HLA-DRA	1.59203	0.00531881	0.0097103
GLIPR1	1.55568	0.000841605	0.00163005

## Sheet: Table_S9
Table S9: Rank velocity genes with a minimum r2 value of 0.5 and minimum correlation coefficient between spliced and unspliced of 0.3 by cluster
Rank	CTB1	CTB2	CTB3	EVT13	EVT9	pre_STB11	pre_STB7
1	HMMR	GPC3	CRISPLD1	PLCL2	PLCL2	CSF3R	BRAF
2	NLRP2	SPP1	CLIP1	WWTR1	WWTR1	ADAM12	COBLL1
3	KCNN4	FLT1	SLC43A2	HEG1	COL27A1	LGALS16	TMEM40
4	TPM1	F13A1	TMEM40	FN1	JAK1	DHRS9	GLDN
5	PTPRF	SERPINE2	RHOBTB1	COL27A1	FBLIM1	PLCL2	KMO
6	TNFSF10	JAM2	SEMA6A	QSOX1	TNFAIP3	SLC1A2	ABHD5
7	HTRA1	AIF1L	SECISBP2L	COL4A1	QSOX1	DYSF	CSF3R
8	SLC40A1	PAPPA2	KCNN4	CBLB	FN1	GPC3	DYSF
9	SPP1	HTRA4	PRKCZ	FBLIM1	CBLB	RIPOR2	PGF
10	SFRP1	EBI3	TNFSF10	DIO2	UPP1	ATG9B	TACC2
11	HSD3B1	TNFSF10	NOTUM	HTRA4	HEG1	AFF1	CYP19A1
12	KRT19	SFRP1	HPGD	UPP1	EPSTI1	SEMA6A	PHOSPHO1
13	HPGD	DIO2	HTRA1	ADAM12	HPCAL1	HPGD	KYNU
14	SLC43A2	COL4A1	PLAC8	HSD3B1	COL4A1	GREM2	ATG9B
15	PAPPA	HSPG2	LGALS16	PTPRF	ADAM12	BRAF	SEMA6A
16	HAPLN3	PAPPA	SLC1A2	NDRG1	HSD3B1	SERPINE2	ZNF292
17	LCMT1-AS2	HMMR	TPM1	TNFAIP3	HSPG2	F13A1	PRKCZ
18	LGALS16	PLOD2	PAPPA	NLRP2	PTPRF	EPSTI1	EPS8L1
19	NOTUM	TPM1	SFRP1	F13A1	DIO2	ZNF292	RHOBTB1
20	HSPG2	EPSTI1	LCMT1-AS2	GPC3	SERPINE2	CPS1	SLC1A2
21	PLOD2	KRT23	SERPINE1	PGF	PRKAG2	SVEP1	MAOA
22	EBI3	SERPINE1	EPS8L1	PRKAG2	NDRG1	EBI3	GPT2
23	PLAC8	LGALS16	OTUB2	JAK1	AIF1L	TPM1	GREM2
24	PRKCZ	RIPOR2	FLT1	HSPG2	PLOD2	SLC40A1	CLIP1
25	OTUB2	LCMT1-AS2	PHOSPHO1	SERPINE2	KRT19	KRT23	DHRS9
26	UPP1	CPS1	AIF1L	RIPOR2	NLRP2	PAPPA	AFF1
27	TNFAIP3	FN1	PAPPA2	EPSTI1	HTRA4	FN1	SECISBP2L
28	WWTR1	KYNU	KRT19	FLT1	HAPLN3	PAPPA2	SVEP1
29	PGF	SLC40A1	SPP1	HTRA1	FLT1	KYNU	RIPOR2
30	F13A1	HPCAL1	CSF3R	GLDN	JAM2	PTPRF	KCNN4
31	ZNF292	DHRS9	F13A1	HAPLN3	SERPINE1	TACC2	HSD11B2
32	TACC2	NDRG1	HSD11B2	HPCAL1	EBI3	KMO	PRKAG2
33	CRISPLD1	HSD11B2	GPT2	NOTUM	HTRA1	JAM2	HSD3B1
34	HSD11B2	PLAC8	HAPLN3	JAM2	PLAC8	PLOD2	OTUB2
35	JAK1	FBLIM1	SLC40A1	PAPPA2	PAPPA2	DIO2	SLC43A2
36	EPS8L1	ADAM12	MAOA	MAOA	PAPPA	TNFSF10	PLCL2
37	PAPPA2	COL27A1	WWTR1	PAPPA	GPC3	SERPINE1	HPCAL1
38	ABHD5	NOTUM	EBI3	EBI3	RIPOR2	HEG1	CPS1
39	SVEP1	ABHD5	KRT23	KRT23	TPM1	CBLB	KRT23
40	JAM2	HPGD	BRAF	PLOD2	KRT23	NOTUM	SLC40A1
41	NDRG1	GLDN	CPS1	SFRP1	NOTUM	SECISBP2L	LCMT1-AS2
42	COL4A1	OTUB2	PGF	SERPINE1	MAOA	HAPLN3	SERPINE1
43	KRT23	KRT19	COBLL1	PLAC8	F13A1	SFRP1	CBLB
44	QSOX1	GREM2	CYP19A1	LGALS16	SFRP1	COL27A1	GPC3
45	AIF1L	JAK1	NDRG1	KYNU	HPGD	SPP1	ADAM12
46	MAOA	TNFAIP3	DYSF	AFF1	ZNF292	RHOBTB1	QSOX1
47	CPS1	PRKAG2	JAM2	OTUB2	COBLL1	COL4A1	NDRG1
48	HTRA4	KMO	HSPG2	LCMT1-AS2	PGF	MAOA	SFRP1
49	DIO2	CSF3R	GREM2	SVEP1	LGALS16	GLDN	NLRP2
50	EPSTI1	GPT2	PLOD2	KMO	GPT2	PLAC8	EBI3
51	HEG1	CYP19A1	SVEP1	AIF1L	ATG9B	GPT2	JAM2
52	AFF1	PGF	GLDN	HMMR	PRKCZ	FBLIM1	HPGD
53	HPCAL1	HTRA1	PRKAG2	CPS1	AFF1	FLT1	F13A1
54	KMO	HAPLN3	HTRA4	COBLL1	OTUB2	QSOX1	TNFSF10
55	FLT1	PLCL2	ZNF292	GPT2	EPS8L1	AIF1L	SPP1
56	GPT2	QSOX1	ATG9B	TACC2	LCMT1-AS2	SLC43A2	TNFAIP3
57	FBLIM1	PHOSPHO1	AFF1	HSD11B2	TNFSF10	CYP19A1	HTRA4
58	CLIP1	HSD3B1	FBLIM1	ZNF292	CPS1	HTRA4	FBLIM1
59	TMEM40	TACC2	SERPINE2	PHOSPHO1	HSD11B2	UPP1	PAPPA2
60	PRKAG2	SVEP1	COL4A1	GREM2	ABHD5	HTRA1	PAPPA
61	SERPINE1	AFF1	DIO2	TNFSF10	KYNU	NDRG1	SERPINE2
62	SEMA6A	PTPRF	DHRS9	EPS8L1	DHRS9	HSPG2	NOTUM
63	DHRS9	EPS8L1	HEG1	ABHD5	SVEP1	COBLL1	AIF1L
64	PHOSPHO1	CRISPLD1	UPP1	DHRS9	HMMR	HMMR	PLOD2
65	PLCL2	MAOA	RIPOR2	PRKCZ	KMO	JAK1	PLAC8
66	GLDN	HEG1	ABHD5	SPP1	SPP1	ABHD5	JAK1
67	SERPINE2	SEMA6A	KYNU	ATG9B	PHOSPHO1	NLRP2	KRT19
68	KYNU	CBLB	CBLB	TPM1	BRAF	EPS8L1	EPSTI1
69	ATG9B	UPP1	KMO	CYP19A1	SECISBP2L	KRT19	DIO2
70	RIPOR2	NLRP2	TNFAIP3	HPGD	GREM2	PRKAG2	HEG1
71	FN1	ZNF292	EPSTI1	BRAF	TACC2	PHOSPHO1	HAPLN3
72	CBLB	SLC43A2	TACC2	SLC40A1	CYP19A1	TNFAIP3	COL27A1
73	RHOBTB1	ATG9B	HPCAL1	SLC1A2	GLDN	TMEM40	CRISPLD1
74	COL27A1	SLC1A2	HMMR	SECISBP2L	DYSF	KCNN4	PTPRF
75	BRAF	DYSF	NLRP2	DYSF	SLC1A2	HPCAL1	UPP1
76	GPC3	SECISBP2L	JAK1	CRISPLD1	SLC40A1	CLIP1	FN1
77	GREM2	WWTR1	COL27A1	KCNN4	CLIP1	LCMT1-AS2	HTRA1
78	CYP19A1	PRKCZ	QSOX1	CSF3R	KCNN4	HSD3B1	HMMR
79	SECISBP2L	COBLL1	PTPRF	RHOBTB1	TMEM40	PRKCZ	HSPG2
80	DYSF	CLIP1	FN1	KRT19	CRISPLD1	HSD11B2	FLT1
81	ADAM12	RHOBTB1	ADAM12	CLIP1	CSF3R	CRISPLD1	LGALS16
82	COBLL1	BRAF	GPC3	TMEM40	RHOBTB1	OTUB2	COL4A1
83	SLC1A2	KCNN4	HSD3B1	SLC43A2	SLC43A2	WWTR1	TPM1
84	CSF3R	TMEM40	PLCL2	SEMA6A	SEMA6A	PGF	WWTR1

## Sheet: Table_S10
Table S10: Genes upregulated in initial state cells (n=30) vs all other cells in the early and late first trimester integrated placental dataset
Gene Names	logFoldChange	p_value	p_adj	Is TF?
PIF1	5.66409	1.46783e-14	2.05636e-11
CENPF	4.49533	2.12716e-19	5.66206e-15
UBE2C	4.28997	1.70985e-18	1.60274e-14
CKAP2L	4.14054	1.69614e-13	1.88116e-10
TOP2A	4.05905	2.00323e-17	1.33305e-13
KIF20A	4.04653	1.09304e-10	6.92725e-08
ASPM	3.98078	2.5967e-17	1.38238e-13
DLGAP5	3.8687	2.37762e-16	7.91094e-13
CENPE	3.81185	4.92581e-13	4.68268e-10
CCDC18	3.76226	6.27895e-09	2.53232e-06
CCDC150	3.74112	0.000557831	0.0447239
KIF15	3.59697	6.1097e-05	0.00789456
ARHGAP11A	3.58971	3.51592e-10	1.90993e-07
HMMR	3.5846	3.29016e-15	5.15162e-12
NEK2	3.52336	3.16905e-07	9.69582e-05
AC091057.6	3.48893	8.48927e-08	2.93464e-05
AURKA	3.48169	1.70035e-15	3.07884e-12
CCNF	3.45236	6.50738e-06	0.00132224
FAM83D	3.45055	2.81844e-09	1.19081e-06
KIF23	3.42617	2.78987e-12	2.39551e-09
PSRC1	3.39802	3.51711e-09	1.46279e-06
RTKN2	3.38556	8.89363e-11	5.91826e-08
KIF14	3.35092	6.65402e-06	0.0013317
NUSAP1	3.33453	1.39992e-16	5.32328e-13
KPNA2	3.33087	7.17443e-16	1.7551e-12
ECT2	3.32609	1.41486e-10	8.75828e-08
TPX2	3.29029	4.39597e-13	4.33377e-10
HMGB2	3.28582	1.80638e-18	1.60274e-14
CEP55	3.28253	1.11172e-07	3.74499e-05
CDCA8	3.26764	7.65721e-10	3.91961e-07
TTK	3.26581	5.73535e-10	2.9934e-07
CDK1	3.25978	3.30982e-16	9.78899e-13
PRC1	3.25543	9.26622e-16	2.0554e-12
GTSE1	3.25507	3.92298e-12	3.26319e-09
SRGAP2C	3.23357	2.84203e-05	0.00429825
KIF20B	3.22818	6.12315e-12	4.93897e-09
MKI67	3.22358	1.3324e-14	1.97033e-11
PLK1	3.2146	3.3177e-08	1.24381e-05
NCAPG	3.19723	1.2419e-08	4.79087e-06
CDCA2	3.19629	2.29645e-06	0.000531539
AURKB	3.19089	3.6949e-14	4.68337e-11
SGO2	3.18863	3.68552e-06	0.00082438
BUB1B	3.17925	3.55495e-05	0.0051149
NDC80	3.17304	8.82292e-07	0.00022294
GAS2L3	3.14215	3.63304e-06	0.000819527
CCNB1	3.14111	7.25304e-16	1.7551e-12
KIFC1	3.13001	2.04028e-07	6.46527e-05
ANLN	3.12507	1.6024e-08	6.09324e-06
CENPL	3.12144	3.72388e-06	0.000826018
CDCA3	3.11979	1.9245e-09	8.39774e-07
PTTG1	3.11189	1.97223e-15	3.28104e-12
TROAP	3.11125	2.09718e-09	9.00365e-07
KIF18A	3.07894	3.00662e-05	0.00449608
BORA	3.02615	0.000313249	0.028555
ARHGEF39	3.02166	9.76583e-06	0.00180079
DEPDC1	3.00337	9.71429e-11	6.30671e-08
SMC4	2.98158	3.52309e-14	4.68337e-11
CIP2A	2.97685	4.27157e-05	0.00598424
KIF2C	2.97417	1.36633e-09	6.16423e-07
CCDC88A	2.93156	1.64747e-06	0.000398659
CKAP2	2.88345	1.08203e-13	1.25224e-10
C21orf58	2.87973	2.43825e-05	0.0037954
MXD3	2.86721	1.08659e-06	0.000270308	Yes
SOGA1	2.85744	2.21818e-05	0.00357839
CENPA	2.85007	1.70582e-05	0.00287377	Yes
LMNB2	2.83316	6.6941e-11	4.56881e-08
KCTD9	2.80539	4.32573e-06	0.000951588
CDKN3	2.79387	7.7236e-09	3.06846e-06
TRIM59	2.7799	3.45945e-10	1.90993e-07
TACC3	2.77106	8.19905e-07	0.000211712
UBE2S	2.76535	1.5988e-11	1.21591e-08
CCNA2	2.75788	2.60379e-12	2.31026e-09
CDC20	2.75761	1.80901e-11	1.30141e-08
KNL1	2.75311	6.61958e-07	0.00017798
RACGAP1	2.73596	6.56197e-07	0.00017798
HYLS1	2.73292	9.61643e-05	0.0110885
ARL6IP1	2.72326	1.33128e-16	5.32328e-13
PRR11	2.70532	0.000222447	0.0216098
NCAPH	2.68193	1.81243e-05	0.00299648
NUF2	2.67872	1.05934e-08	4.14671e-06
HIST1H4C	2.66357	1.92216e-10	1.16282e-07
CENPJ	2.64656	0.000404566	0.0344049
G2E3	2.64132	6.14565e-05	0.00790266
FLNA	2.61041	1.67544e-06	0.000401773
CKS2	2.5343	1.73502e-15	3.07884e-12
CEP295	2.52474	1.93213e-05	0.00315518
SCLT1	2.5209	1.43541e-05	0.00249723
ZNF302	2.5189	0.000637777	0.0493499	Yes
TUBB4B	2.50951	1.1559e-15	2.36675e-12
BUB3	2.50866	4.23617e-14	5.12538e-11
MIS18BP1	2.50272	1.4781e-12	1.35669e-09
H2AFX	2.48118	9.31383e-12	7.29164e-09
CCNB2	2.47281	1.67406e-11	1.23778e-08
SMTN	2.44999	4.94037e-05	0.0066803
SPC24	2.44911	0.000111043	0.0126314
STMN1	2.42674	3.58201e-13	3.66716e-10
SGO1	2.37314	6.60861e-05	0.00841665
ZNF165	2.37073	0.000112828	0.0127256	Yes
BRCA2	2.34806	0.000167232	0.0173063
LMNB1	2.32963	9.35902e-10	4.44854e-07
NCAPD3	2.32293	3.39616e-05	0.00496697
NCAPD2	2.31335	0.000112605	0.0127256
TTF2	2.31125	0.000629584	0.0491445
SPTBN1	2.2856	8.09397e-07	0.000211221
NSD2	2.28193	8.87808e-07	0.00022294
BIRC5	2.27764	2.57421e-10	1.52268e-07
SUN2	2.27581	0.000576488	0.0459047
DIAPH3	2.27125	2.35953e-05	0.0037575
CKAP5	2.26735	6.85626e-08	2.43333e-05
KNSTRN	2.26157	0.000590189	0.0466161
NUP98	2.24337	1.662e-05	0.00281777
BTBD3	2.23243	0.000104151	0.0118983
CENPC	2.22847	6.77672e-05	0.00850862
KIF22	2.21233	8.09333e-10	4.06469e-07
ASXL1	2.20521	1.34676e-07	4.37171e-05
RNF26	2.19977	4.67222e-06	0.000994922
PHACTR4	2.1778	6.32873e-05	0.00809895
XRCC2	2.17378	0.000101407	0.0116347
ZNF701	2.16582	8.61655e-05	0.0103313	Yes
PBK	2.14164	5.31526e-05	0.00707407
HP1BP3	2.13628	2.25005e-13	2.39567e-10
AC004556.3	2.12526	0.000115281	0.0128931
ATAD5	2.11968	8.27185e-07	0.000211712
LBR	2.1149	6.42041e-08	2.30944e-05
MND1	2.1001	9.34273e-05	0.0109553
GPSM2	2.09724	4.75592e-07	0.000140659
MAD2L1	2.06799	5.21693e-06	0.0011021
MICAL3	2.03421	0.000422748	0.0357228
AASS	2.00476	4.52344e-06	0.000971008
CCDC34	2.00346	1.48625e-06	0.000366305
MT-CO3	1.99266	4.50917e-06	0.000971008
UBALD2	1.98856	8.83884e-06	0.00168052
DHTKD1	1.97987	2.19901e-05	0.0035691
DBF4	1.97667	7.02656e-06	0.00137524
JPT1	1.97386	5.21272e-10	2.77504e-07
TUBA1B	1.95694	3.2946e-10	1.86587e-07
ZCCHC8	1.93645	0.000231818	0.0224383
TUBA1C	1.8997	3.51714e-11	2.46366e-08
TMPO	1.89389	1.12555e-07	3.74499e-05
FRYL	1.88933	9.10747e-05	0.0107379
CCDC144A	1.874	0.000130326	0.0140446
RAD21	1.86888	1.36018e-09	6.16423e-07
ANP32E	1.84909	7.82751e-08	2.74148e-05
CDC27	1.84884	9.38875e-05	0.010961
PRRC2A	1.83492	8.29048e-05	0.00998534
TET1	1.82796	0.0001559	0.0162735	Yes
MT-ND3	1.81929	1.95693e-06	0.00046097
AKAP1	1.79764	0.000303331	0.0278416
BRD8	1.79551	0.000126634	0.0137581
UBE2T	1.78442	2.03394e-06	0.000474907
MT-ND4	1.77756	6.566e-06	0.00132404
MT-CO2	1.7591	5.03285e-05	0.00673188
WEE1	1.75865	5.63647e-08	2.05523e-05
HTRA1	1.75827	0.000122155	0.0134918
RFC3	1.75039	1.33525e-05	0.00236945
KMT2A	1.74082	6.6606e-05	0.00844247	Yes
DCP2	1.72602	3.91321e-08	1.44669e-05
AL121944.1	1.72537	1.55313e-05	0.00266717
NAA15	1.72303	0.000133112	0.0142296
CENPK	1.71416	2.91899e-05	0.0043897
NUP50	1.70104	0.000113623	0.0127613
DTYMK	1.68747	5.43489e-07	0.000155555
TUBB	1.67198	5.36723e-09	2.19792e-06
MT-ND1	1.64762	5.33534e-06	0.00111824
H2AFV	1.64661	1.25893e-09	5.87896e-07
CKS1B	1.62793	8.98965e-08	3.06777e-05
H1FX	1.62777	5.78257e-07	0.000160334
H2AFZ	1.61472	1.2561e-07	4.12777e-05
AMD1	1.61276	0.000310528	0.0284042
MT-ND2	1.6107	5.35605e-05	0.00708465
ATRX	1.60637	6.0056e-07	0.000164801
LAMB1	1.60617	4.44151e-05	0.0061721
GBP1	1.60567	3.62767e-05	0.00516371
TTC9C	1.60562	0.000354844	0.0314838
DICER1	1.59671	7.4478e-05	0.00922073
CDKN1B	1.5963	0.000176496	0.017863
FUS	1.59455	3.26881e-10	1.86587e-07
LPP	1.59323	0.000342873	0.0307293
MT-CYB	1.58904	9.11702e-05	0.0107379
MT-ATP6	1.57465	0.000122787	0.0135055
NUCKS1	1.5707	8.51999e-10	4.19972e-07
DSC3	1.56763	4.94409e-05	0.0066803
KLF6	1.56401	3.74071e-07	0.000111877	Yes
NHLRC3	1.5518	9.19034e-06	0.0017267
HMGB1	1.52865	1.87376e-09	8.31262e-07
XIST	1.52305	0.000628592	0.0491445
ORC6	1.51231	0.000327928	0.0296897
ZWINT	1.50976	1.63093e-06	0.000398276
DCAF7	1.50851	2.75522e-05	0.00421485
DHX9	1.5064	4.45203e-05	0.0061721
TPM1	1.48946	2.80406e-07	8.67888e-05
PRRC2B	1.48535	0.000548245	0.0440882
CBX5	1.48125	7.93992e-05	0.00969472
TEAD1	1.47907	9.51513e-05	0.01106	Yes
SMC2	1.46969	0.000121549	0.0134808
RRM2	1.46785	0.000637211	0.0493499
ERVH48-1	1.4633	2.68501e-07	8.40819e-05
PITPNB	1.45476	3.05255e-05	0.00453926
NR6A1	1.45423	0.000259554	0.0244993	Yes
SNHG1	1.4534	0.000371009	0.0320647
MYADM	1.45122	0.000429968	0.036218
CALM2	1.44854	9.33707e-10	4.44854e-07
KIF5B	1.44355	1.24447e-05	0.0022382
DDX39A	1.4404	3.53085e-05	0.0051149
NKTR	1.40716	3.77449e-05	0.00534411
ADAMTSL4	1.40409	3.26441e-06	0.000742667
ESRP1	1.40185	3.54917e-05	0.0051149
CAND1	1.39437	0.000544009	0.0440243
SRSF10	1.39293	1.42261e-05	0.00249124
MT-ND4L	1.38464	3.84137e-05	0.00541003
RTF1	1.38264	1.57416e-07	5.04832e-05
CNTNAP2	1.3823	0.000136519	0.0145355
BCAM	1.37914	4.84801e-07	0.000141807
ZCCHC9	1.37525	0.000162777	0.016925
CENPW	1.36616	0.000500783	0.0416233
CDCA4	1.36161	2.7818e-05	0.0042312
CENPN	1.35034	0.000123665	0.0135461
ACTN1	1.34438	4.68575e-05	0.00642914
PEG3	1.33462	5.64531e-07	0.000159791	Yes
DNTTIP2	1.33408	0.000291529	0.0270611
PTCD3	1.33316	0.000323511	0.0293898
TYMS	1.33088	2.67457e-05	0.00413905
SMC3	1.31502	7.98819e-05	0.00970911
RIF1	1.31432	7.61216e-05	0.00938058
WSB1	1.31395	7.028e-07	0.000187071
PRKCSH	1.30913	1.36349e-05	0.00240353
ARID1B	1.30854	0.000209714	0.0207515
FHIT	1.30625	0.000169045	0.0173063
METTL7A	1.3004	6.76167e-05	0.00850862
YWHAH	1.29584	5.89753e-06	0.0012169
GPBP1	1.29534	2.71397e-06	0.000622761	Yes
FOSB	1.29474	1.82476e-05	0.00299824	Yes
CCAR1	1.29134	0.000213219	0.0208657
UPF3A	1.28491	0.000329107	0.0296955
RPA1	1.28204	0.00023814	0.0229667
SFPQ	1.28135	5.70296e-07	0.000159791
CSE1L	1.27373	0.000644221	0.049704
MPZL1	1.2701	6.83344e-06	0.00135741
AHNAK	1.26964	9.21148e-06	0.0017267
SF1	1.26866	3.3781e-05	0.00496697
MT-ND6	1.2633	4.65311e-05	0.00641743
MINDY2	1.26319	0.000145848	0.0153446
IER2	1.26012	2.4168e-05	0.00378415
LSM8	1.25649	6.39032e-06	0.00130844
CCNL1	1.25319	9.80969e-06	0.00180079
DEK	1.25219	1.69427e-06	0.000402662
IRX2	1.24916	0.00036102	0.03182	Yes
PHIP	1.24826	5.37643e-05	0.00708465
BCL7C	1.24132	0.000509531	0.0419168
POLR2J3	1.23287	4.84242e-05	0.00661002
PCM1	1.22546	0.000263903	0.0247344
ADAMTS6	1.22412	0.000291778	0.0270611
FBN2	1.22173	1.60074e-05	0.00273131
JUN	1.21991	0.000192269	0.0191678	Yes
LIMS1	1.21916	0.000211634	0.020787
RBBP6	1.219	0.000404178	0.0344049
ERVMER34-1	1.21852	0.000544143	0.0440243
SYNE2	1.20903	1.20102e-05	0.00217475
PAXX	1.20444	5.58408e-05	0.00726825
IQGAP1	1.19442	7.7957e-05	0.00956249
XPO1	1.19285	0.000337698	0.0303678
DDX3X	1.1879	2.37155e-05	0.0037575
TGIF1	1.18277	6.86323e-05	0.00857679	Yes
SMC1A	1.18179	8.71396e-05	0.0104013
MT-ND5	1.17662	5.59768e-05	0.00726825
MOB1A	1.17421	0.000302585	0.0278416
SRSF7	1.16854	5.47745e-06	0.00113905
EML4	1.16469	2.71277e-05	0.0041739
SLC38A1	1.16044	2.3578e-05	0.0037575
SERPINH1	1.16044	1.80822e-05	0.00299648
HNRNPU	1.13781	1.16224e-05	0.00211895
PCLAF	1.13587	0.00012447	0.0135785
TOP2B	1.13566	0.000239137	0.0229796
PHF14	1.13496	0.000575644	0.0459047
NIPBL	1.12431	0.000633515	0.0493067
NRP2	1.12382	3.62108e-05	0.00516371
SCAF11	1.1238	0.000144393	0.0153125
RCOR1	1.11866	0.000520059	0.0425936
KLHL42	1.11825	0.000145422	0.0153446
DYNLL2	1.11706	0.000370109	0.0320647
SIGLEC6	1.11648	0.000362781	0.0318529
ZFP36L1	1.11501	5.48587e-05	0.00719325
ITGA6	1.11494	0.000179848	0.0181333
FAM120A	1.11027	0.000363787	0.0318529
TPR	1.10488	1.45398e-05	0.00251312
HELLS	1.10311	0.000149628	0.0156803
BAZ1B	1.09577	0.000584725	0.046322
MYH9	1.09083	0.000539275	0.0438973
RBPMS	1.08235	0.000252201	0.0239753
NAP1L4	1.07372	0.000168889	0.0173063
RHEB	1.06614	3.31078e-05	0.00489591
HNRNPA3	1.05153	4.47864e-06	0.000971008
BCLAF1	1.04527	8.81483e-05	0.0104747
GSPT1	1.04363	0.000604535	0.047608
SMARCA2	1.04345	0.00021934	0.021386
RUVBL2	1.04282	0.000510221	0.0419168
SSRP1	1.03646	0.000172225	0.0174973
HNRNPH3	1.02736	0.000244244	0.023386
RBMX	1.02462	0.000245973	0.0234671
HNRNPDL	1.02429	7.1021e-06	0.00137988
PNN	1.01937	0.000194242	0.0192923
HMGN2	1.01708	7.69931e-06	0.00148507
RSRC2	1.01267	0.000119586	0.0133186
ASPH	1.01113	0.0005459	0.0440327
YTHDC1	1.00677	0.000448469	0.0376573
ECHDC2	1.00614	0.000127509	0.0137969
CCT5	1.00525	0.00029397	0.0271697

[truncated: 3 more sheets: Table_S11, Table_S12, Table_S13]
